# Supplementary material for: Preparation and Antibacterial Activity of Some New 4-(2-Heterylidenehydrazinyl)-7-chloroquinoline Derivatives
Source: Hindawi journal article supplement (doi:10.1155/2018/4301847), 2018-01-01

## SUPPLYMENTARY DATA OF

### **Preparation and Antibacterial Activity of Some New 4-(2-Heterylidenehydrazinyl)-7-Chloroquinoline Derivatives**

**Duc Le Trong,<sup>1</sup> Nam Pham Ngoc,<sup>2</sup> Cong Nguyen Tien<sup>1\*</sup>**

<sup>1</sup>*Department of Chemistry, Ho Chi Minh City University of Education, Ho Chi Minh City 700000, Vietnam*

<sup>2</sup>*Department of Organic Chemistry, University of Science, Vietnam National University – Ho Chi Minh City, Ho Chi Minh City 700000, Vietnam*

\* Correspondence to: Cong Nguyen Tien, Chemistry department, Ho Chi Minh City University of Education, 280 An Duong Vuong Str., Dist. 5, Ho Chi Minh City, Viet Nam. E-mail: [congnt@hcmup.edu.vn](mailto:congnt@hcmup.edu.vn). Tel: +84-908 121 866

## CONTENTS

|                                                          |    |
|----------------------------------------------------------|----|
| S1. IR spectrum of compound (2) .....                    | 3  |
| S2. <sup>1</sup> H-NMR spectrum of compound (2).....     | 3  |
| S3. <sup>13</sup> C-NMR spectrum of compound (2).....    | 4  |
| S4. <sup>1</sup> H-NMR spectrum of compound (3a) .....   | 4  |
| S5. <sup>1</sup> H-NMR spectrum of compound (3b).....    | 5  |
| S6. <sup>1</sup> H-NMR spectrum of compound (3c) .....   | 5  |
| S7. <sup>1</sup> H-NMR spectrum of compound (3d).....    | 6  |
| S8. <sup>1</sup> H-NMR spectrum of compound (3e) .....   | 6  |
| S9. <sup>1</sup> H-NMR spectrum of compound (3f) .....   | 7  |
| S10. IR spectrum of compound (4a) .....                  | 7  |
| S11. HR-MS spectrum of compound (4a).....                | 8  |
| S12. <sup>1</sup> H-NMR spectrum of compound (4a) .....  | 9  |
| S13. <sup>13</sup> C-NMR spectrum of compound (4a) ..... | 9  |
| S14. IR spectrum of compound (4b) .....                  | 10 |
| S15. HR-MS spectrum of compound (4b) .....               | 11 |
| S16. <sup>1</sup> H-NMR spectrum of compound (4b).....   | 12 |
| S17. <sup>13</sup> C-NMR spectrum of compound (4b).....  | 12 |
| S18. NOESY spectrum of compound (4b) (expanded).....     | 13 |
| S19. HSQC spectrum of compound (4b) (expanded) .....     | 14 |
| S20. HMBC spectrum of compound (4b) (Expanded).....      | 14 |
| S21. IR spectrum of compound (4c) .....                  | 15 |
| S22. HR-MS spectrum of compound (4c).....                | 16 |
| S23. <sup>1</sup> H-NMR spectrum of compound (4c) .....  | 17 |
| S24. <sup>13</sup> C-NMR spectrum of compound (4c) ..... | 17 |
| S25. IR spectrum of compound (4d) .....                  | 18 |
| S26. HR-MS spectrum of compound (4d) .....               | 19 |
| S27. <sup>1</sup> H-NMR spectrum of compound (4d).....   | 20 |
| S28. <sup>13</sup> C-NMR spectrum of compound (4d).....  | 20 |
| S29. NOESY spectrum of compound (4d) (expanded).....     | 21 |
| S30. IR spectrum of compound (4e) .....                  | 21 |
| S31. HR-MS spectrum of compound (4e).....                | 22 |
| S32. <sup>1</sup> H-NMR spectrum of compound (4e) .....  | 23 |
| S33. <sup>13</sup> C-NMR spectrum of compound (4e).....  | 23 |

|                                                          |    |
|----------------------------------------------------------|----|
| S34. NOESY spectrum of compound (4e) (expanded) .....    | 24 |
| S35. HSQC spectrum of compound (4e) (expanded).....      | 24 |
| S36. HMBC spectrum of compound (4e) (expanded) .....     | 25 |
| S37. IR spectrum of compound (4f).....                   | 25 |
| S38. HR-MS spectrum of compound (4f) .....               | 26 |
| S39. <sup>1</sup> H-NMR spectrum of compound (4f) .....  | 27 |
| S40. <sup>13</sup> C-NMR spectrum of compound (4f) ..... | 27 |

## S1. IR spectrum of compound (2)

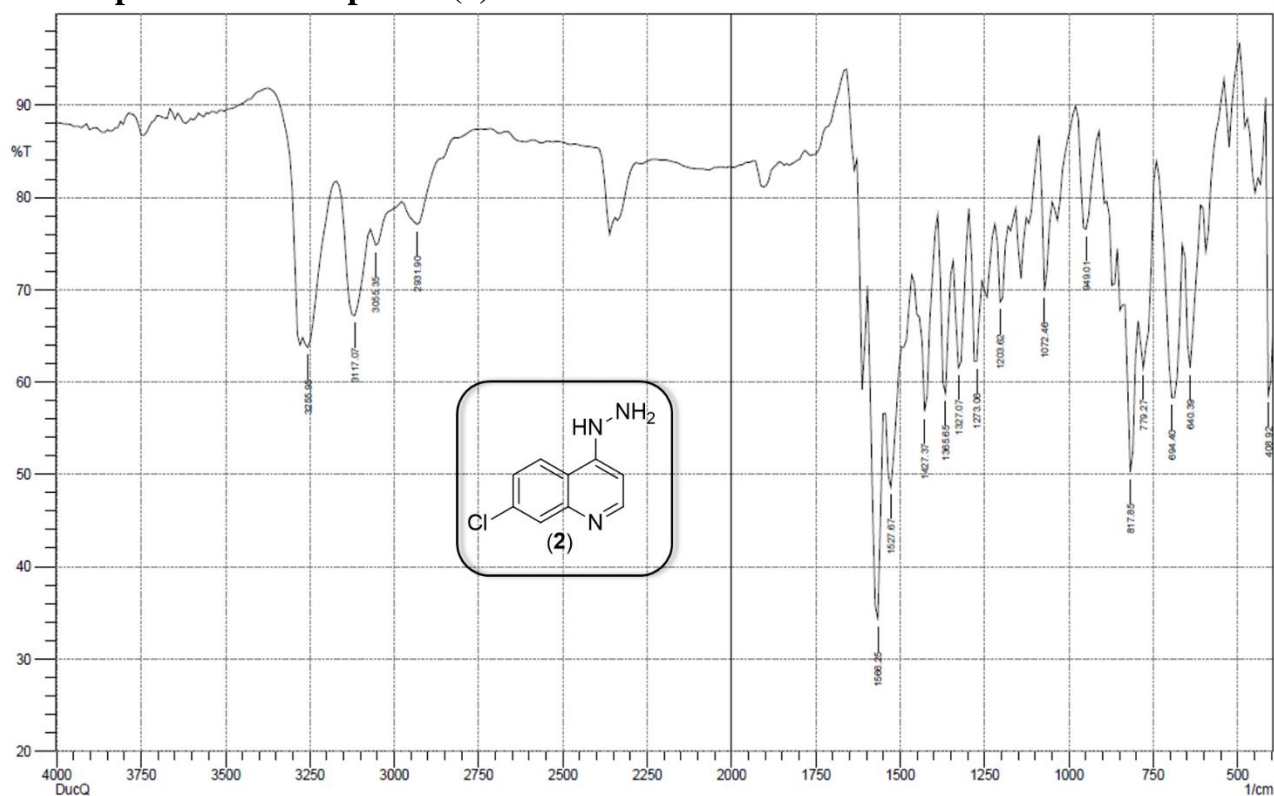

## S2. $^1\text{H}$ -NMR spectrum of compound (2)

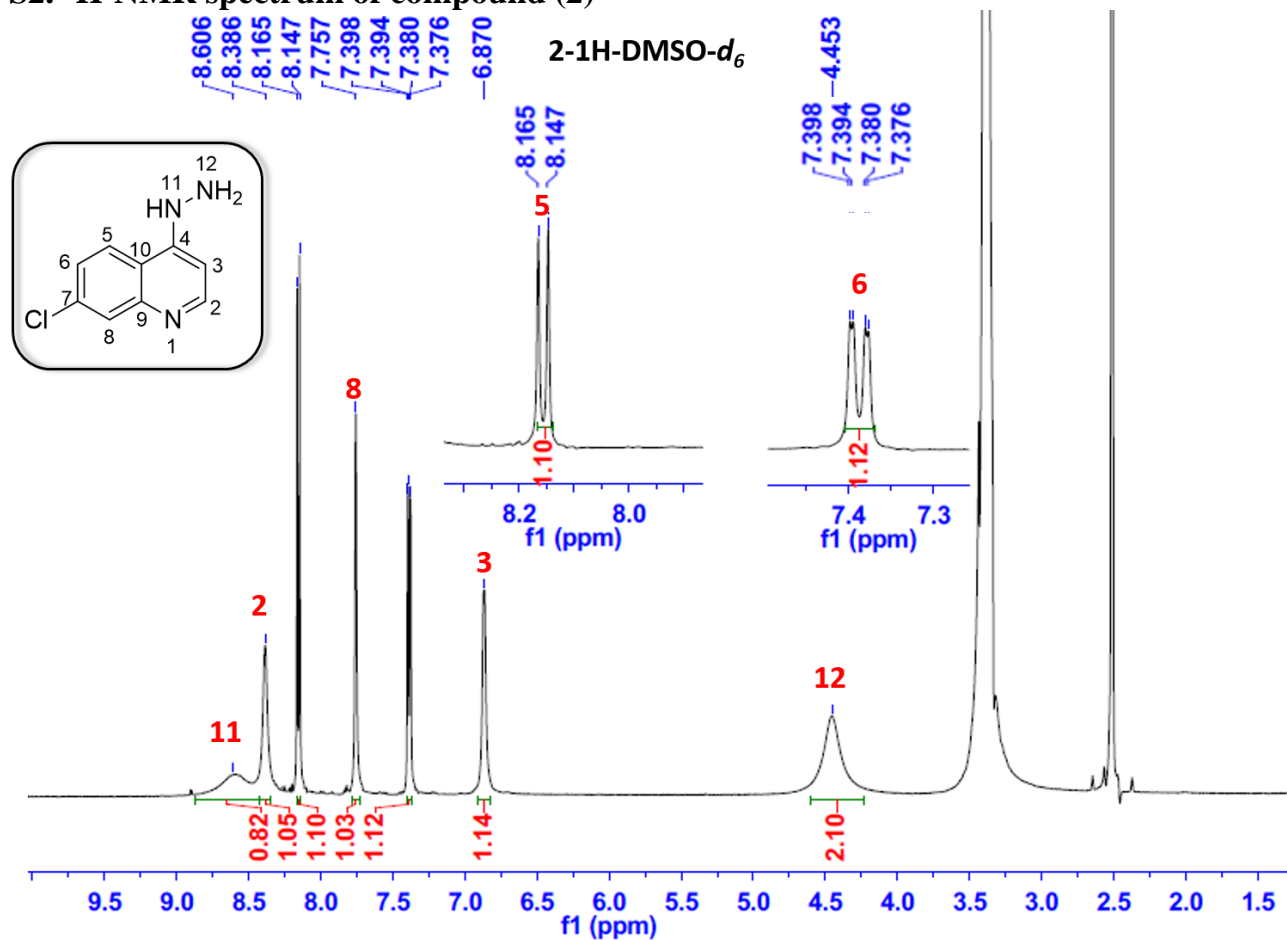

### S3. <sup>13</sup>C-NMR spectrum of compound (2)

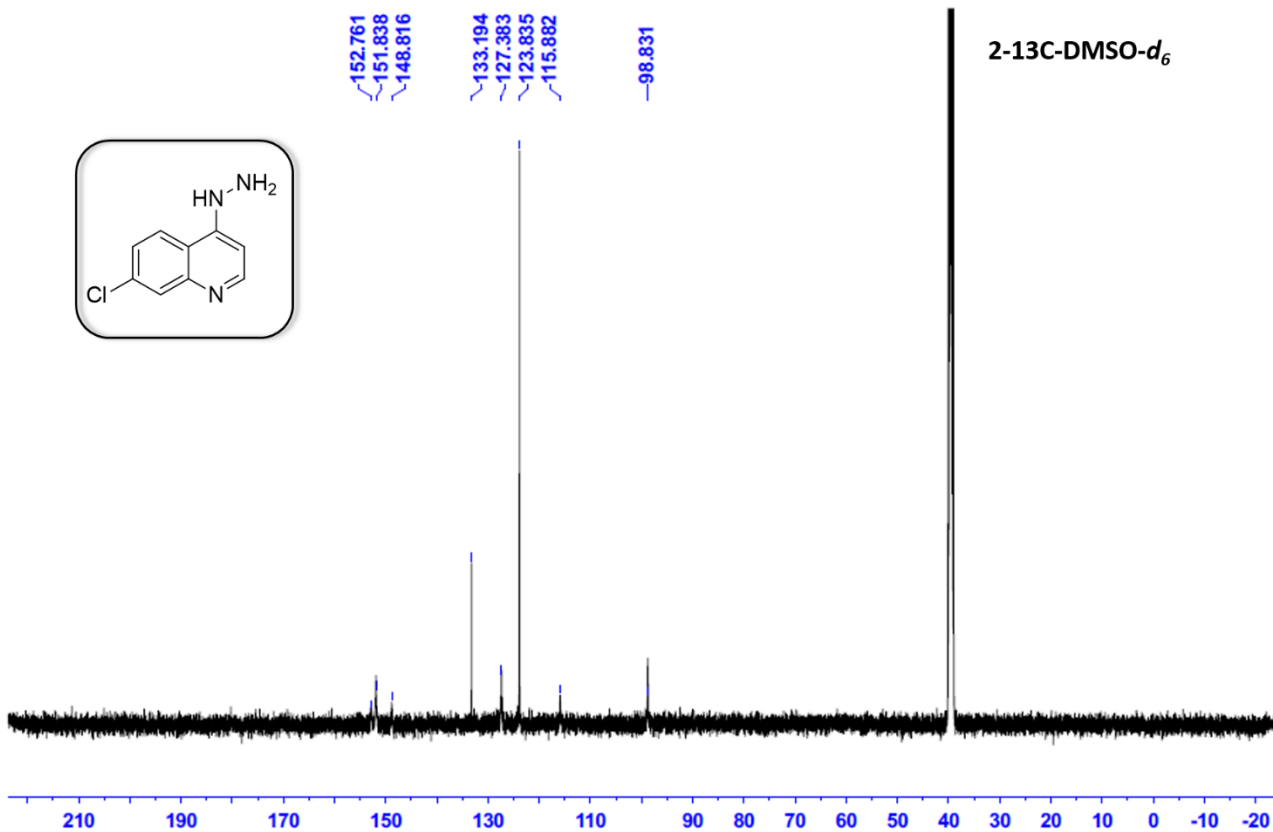

#### S4. <sup>1</sup>H-NMR spectrum of compound (3a)

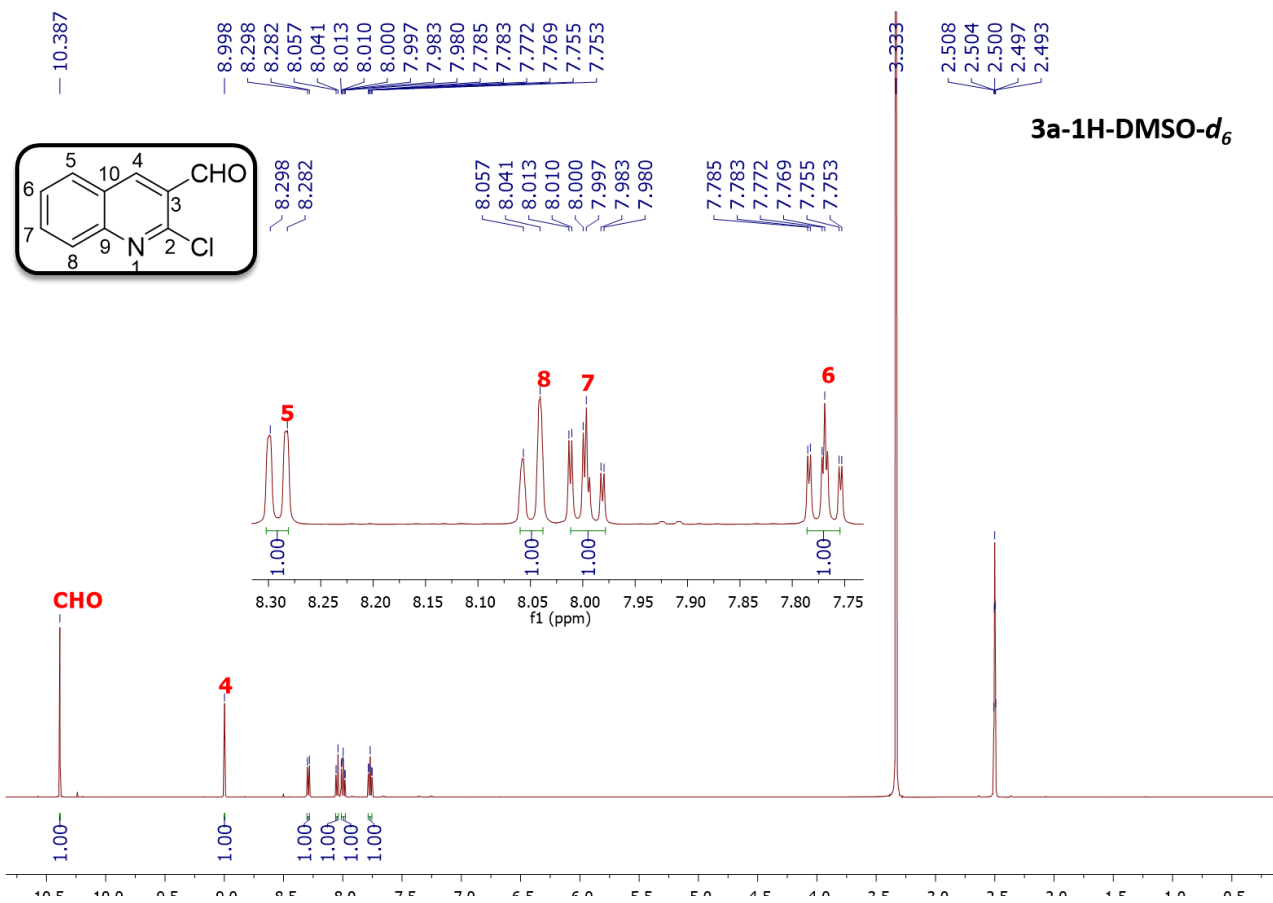

### S5. $^1\text{H}$ -NMR spectrum of compound (3b)

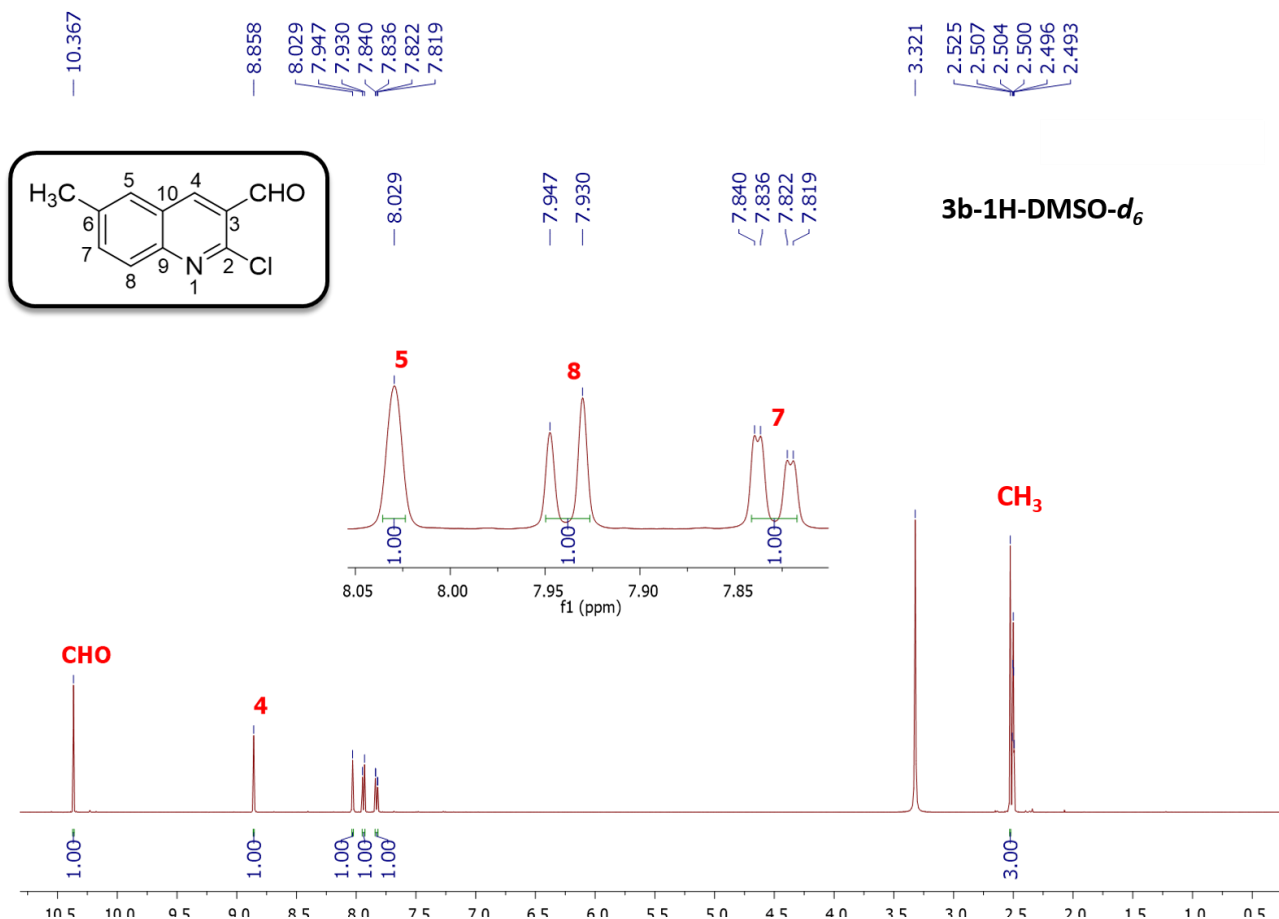

### S6. $^1\text{H}$ -NMR spectrum of compound (3c)

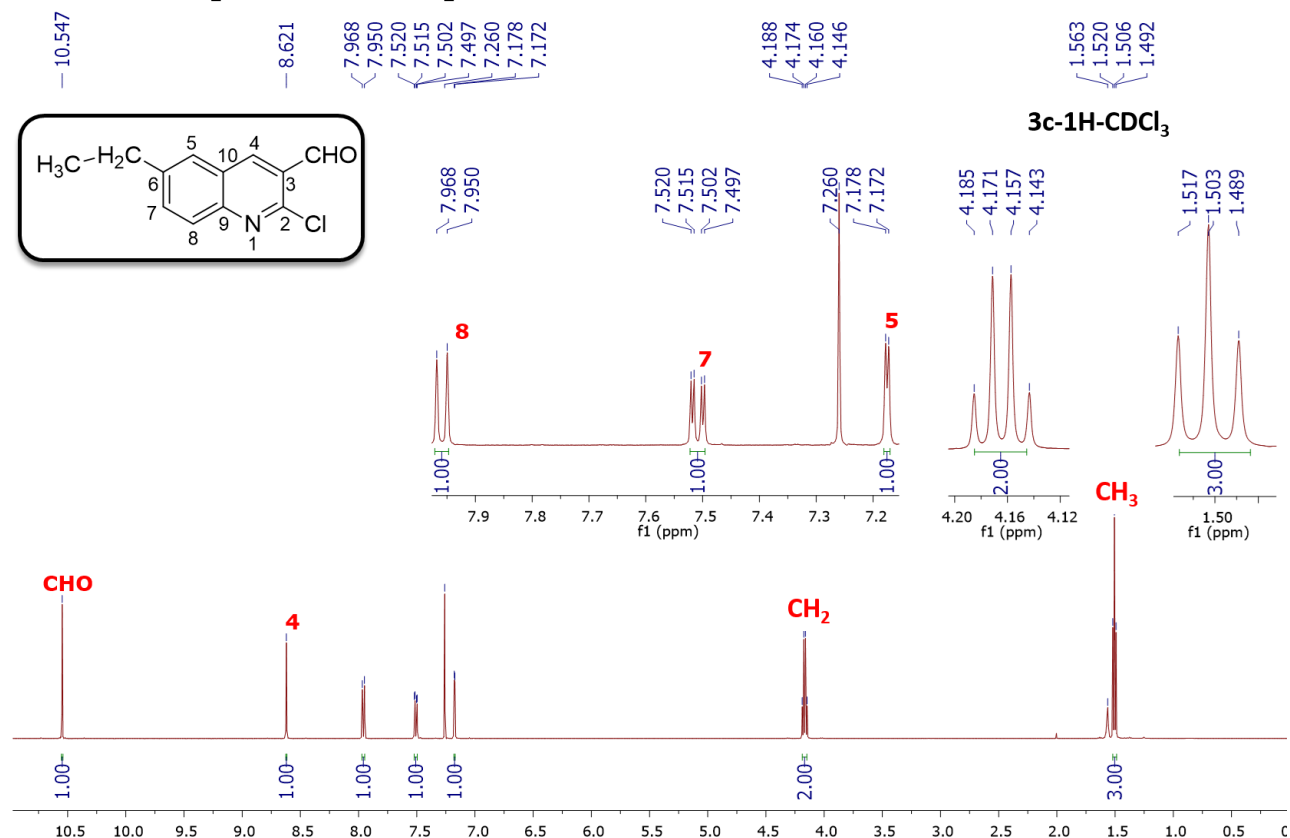

### S7. $^1\text{H}$ -NMR spectrum of compound (3d)

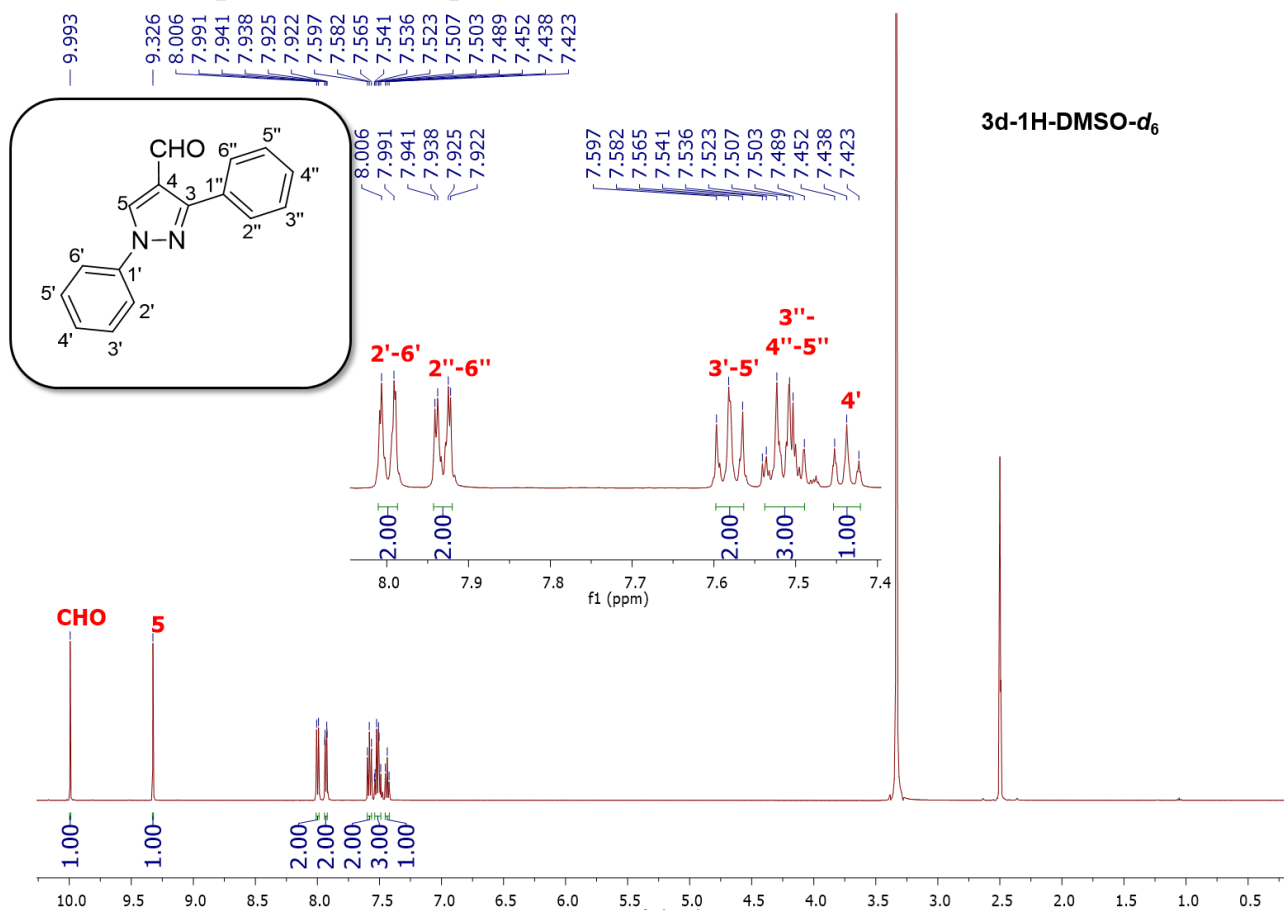

### S8. $^1\text{H}$ -NMR spectrum of compound (3e)

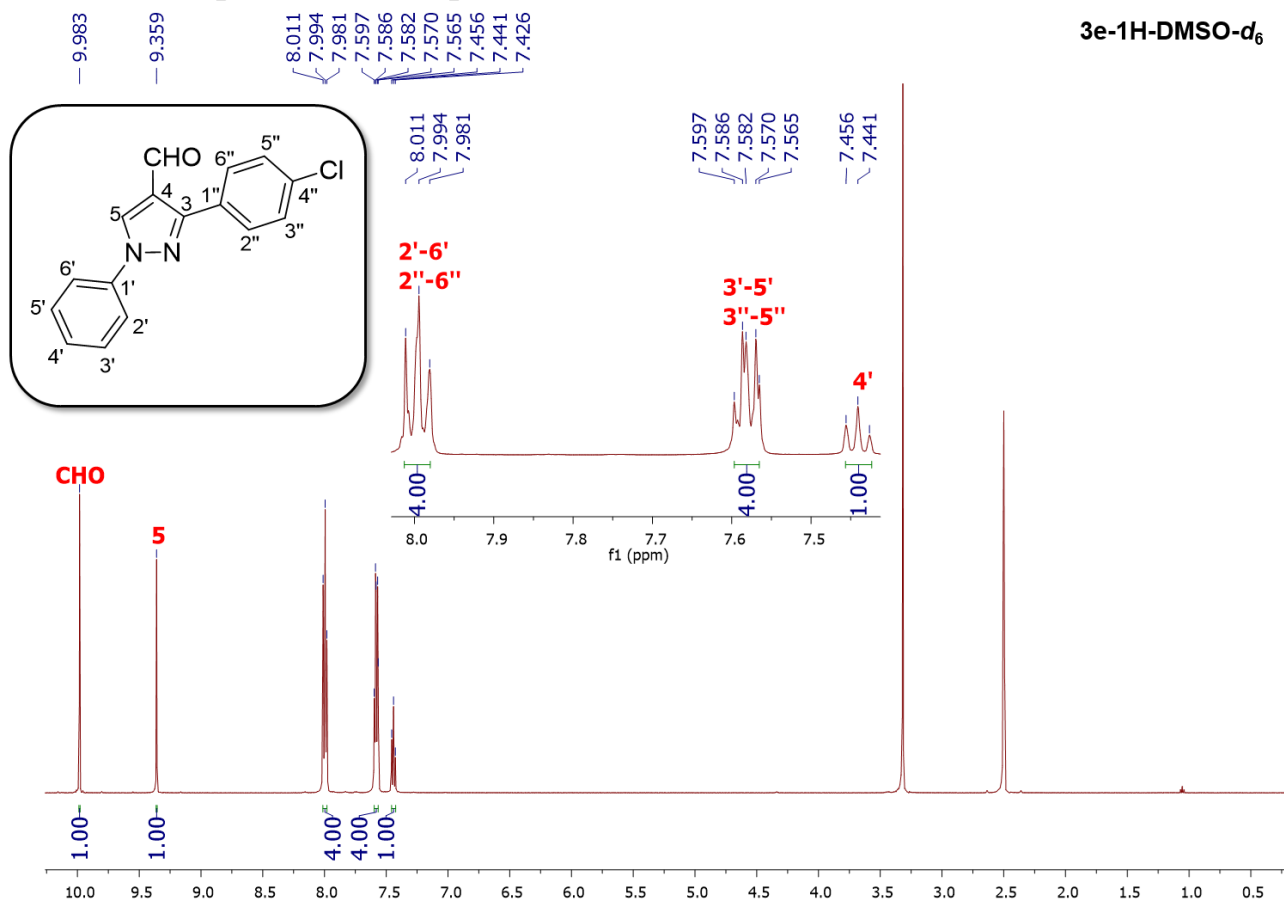

### S9. <sup>1</sup>H-NMR spectrum of compound (3f)

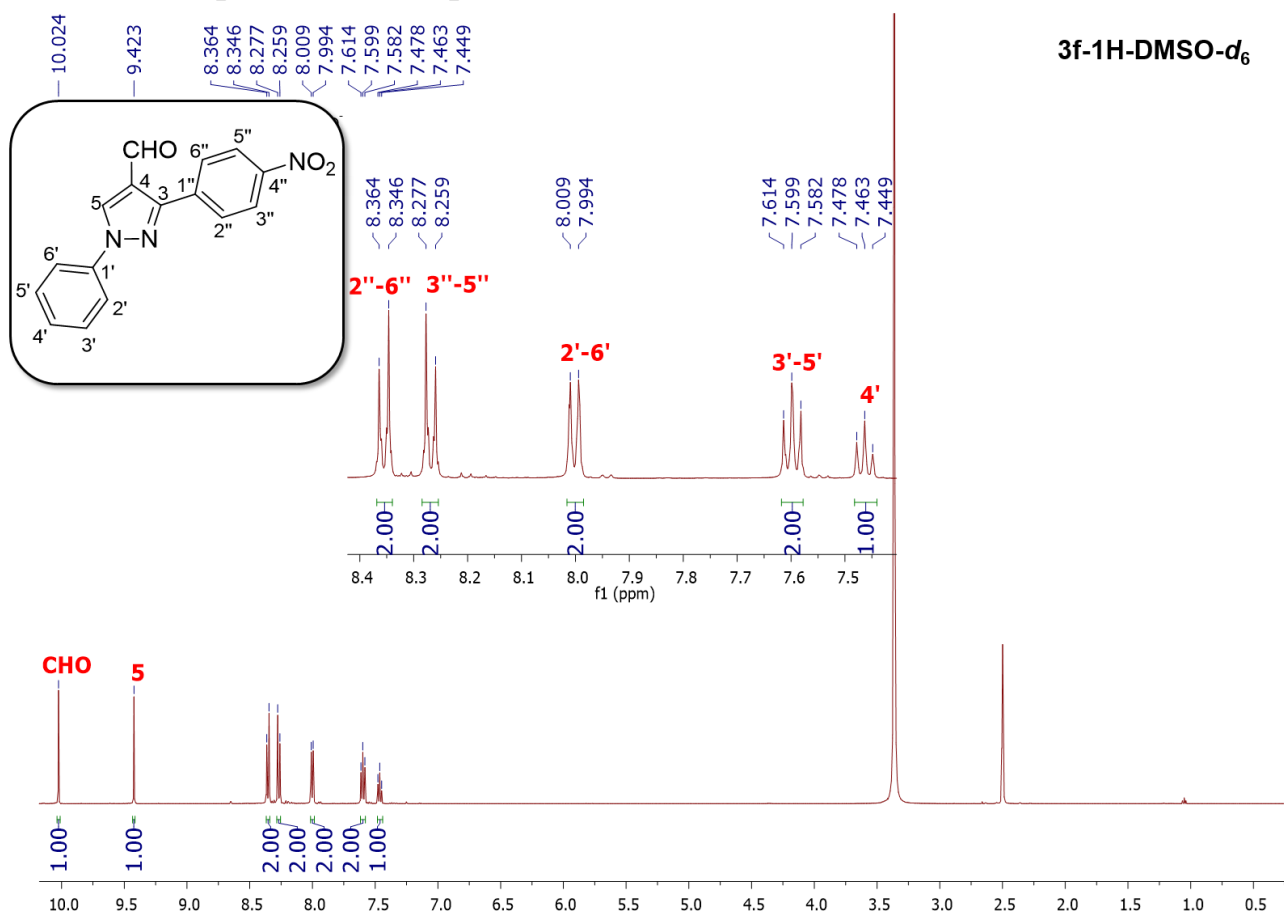

### S10. IR spectrum of compound (4a)

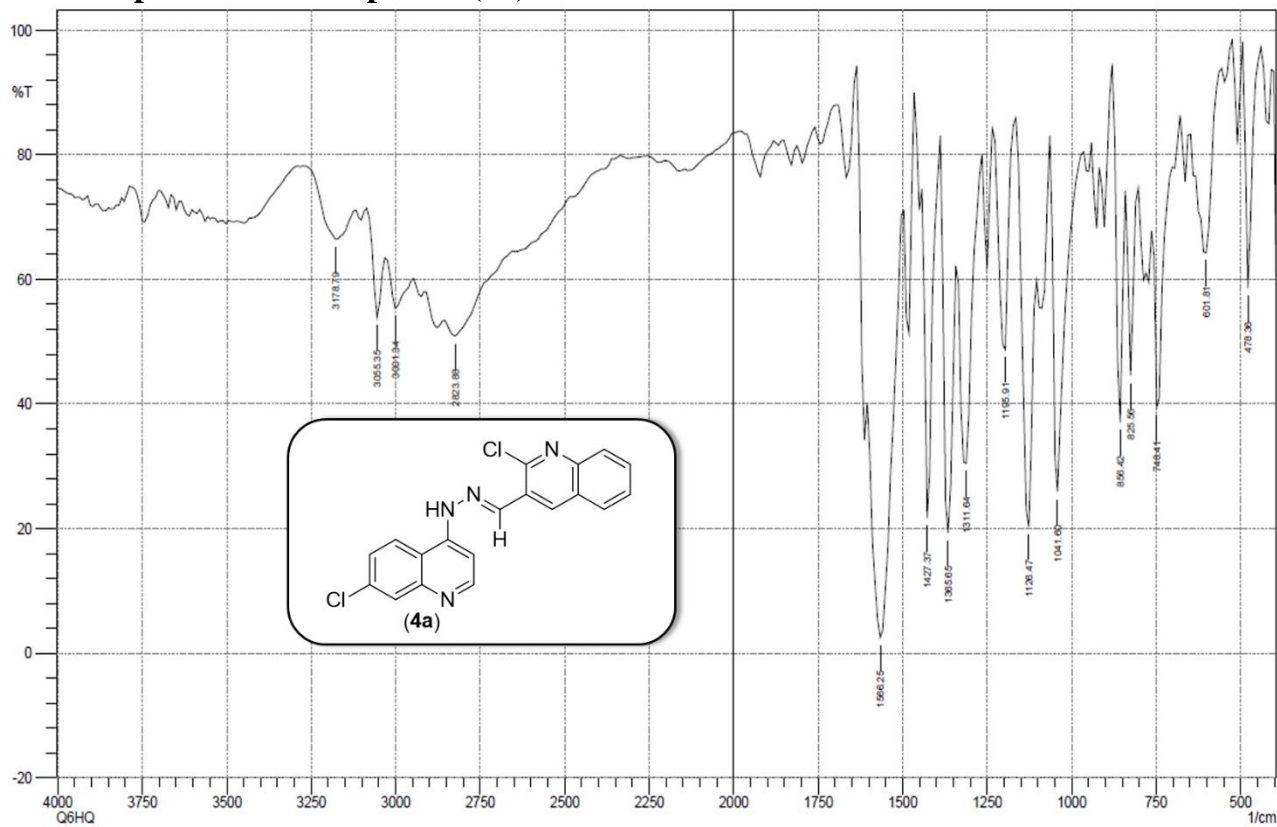



# S11. HR-MS spectrum of compound (4a)

## Display Report

### Analysis Info

Analysis Name D:\Data\Glyphosate\Q-6HQ\_2-F,1\_01\_462.d  
 Method lc\_ms\_test.m  
 Sample Name Q-6HQ  
 Comment

Acquisition Date 7/31/2016 11:19:32 AM

Operator Anh Mai  
 Instrument micrOTOF-Q 10187

### Acquisition Parameter

|             |          |                       |           |                  |           |
|-------------|----------|-----------------------|-----------|------------------|-----------|
| Source Type | ESI      | Ion Polarity          | Positive  | Set Nebulizer    | 1.2 Bar   |
| Focus       | Active   | Set Capillary         | 4500 V    | Set Dry Heater   | 200 °C    |
| Scan Begin  | 50 m/z   | Set End Plate Offset  | -500 V    | Set Dry Gas      | 9.0 l/min |
| Scan End    | 3000 m/z | Set Collision Cell RF | 350.0 Vpp | Set Divert Valve | Source    |

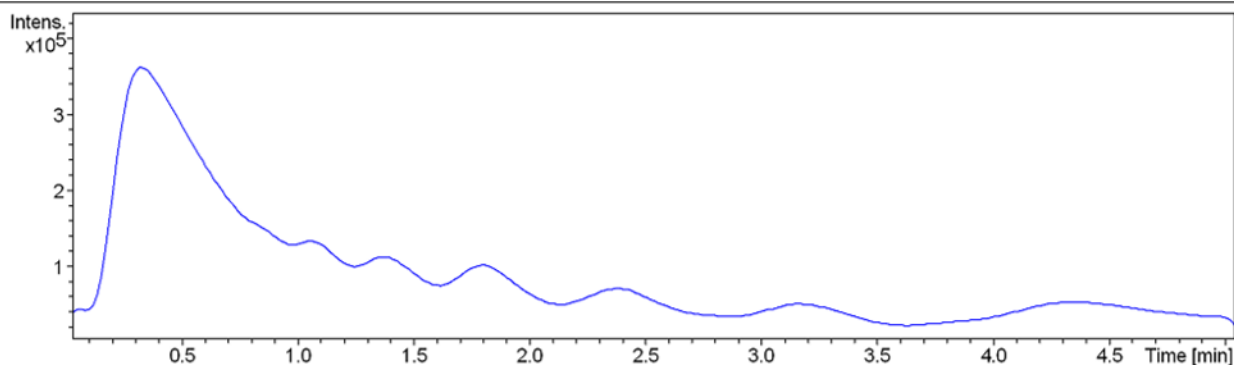

— TIC +All MS, Smoothed (2.02,1,GA)

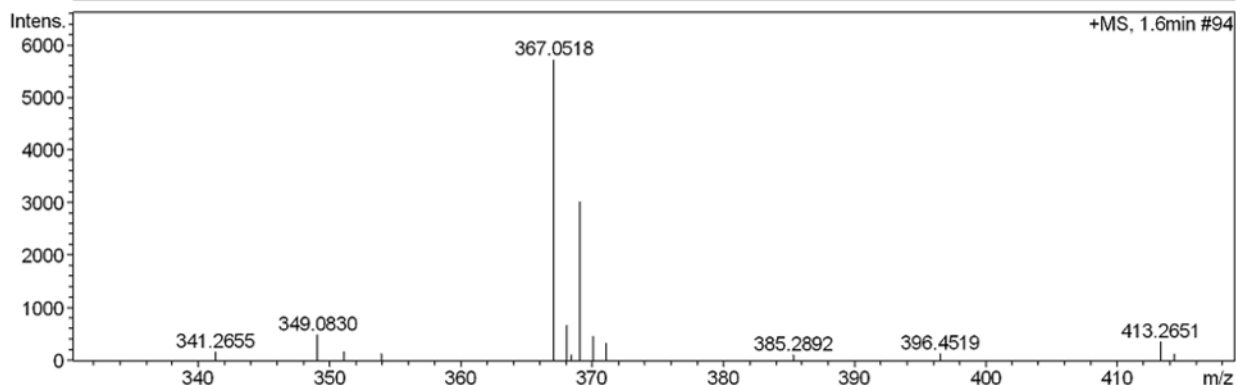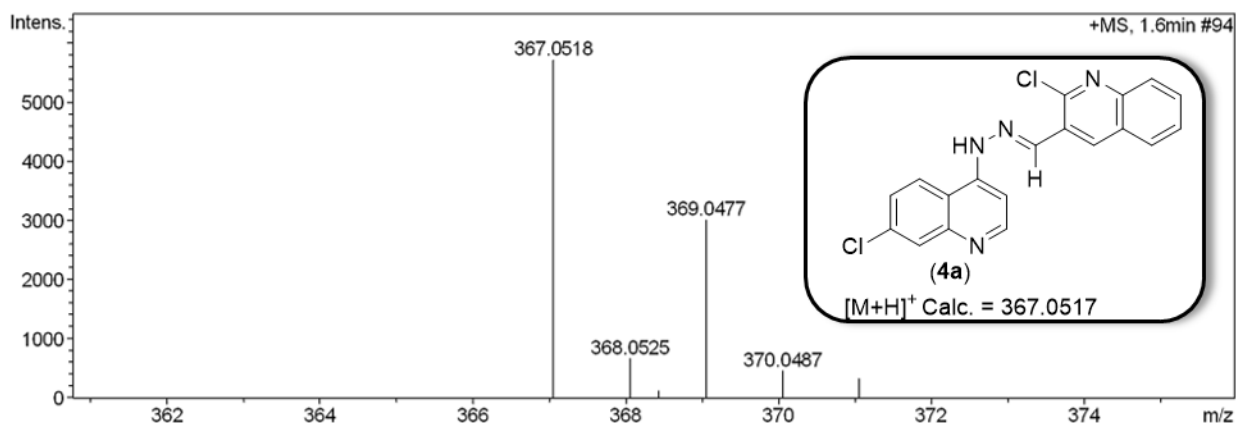

S12.  $^1\text{H}$ -NMR spectrum of compound (4a)

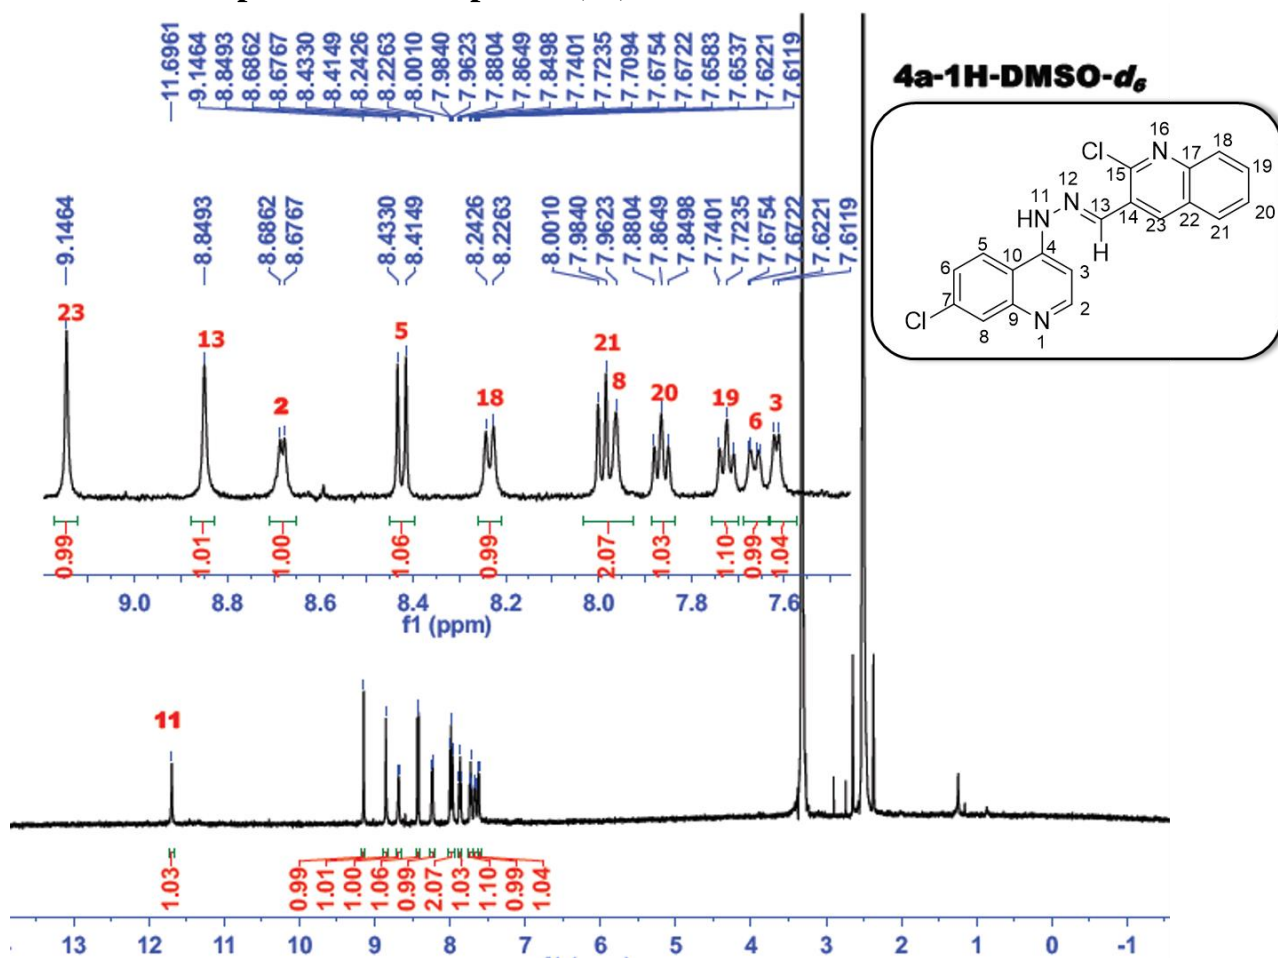

S13.  $^{13}\text{C}$ -NMR spectrum of compound (4a)

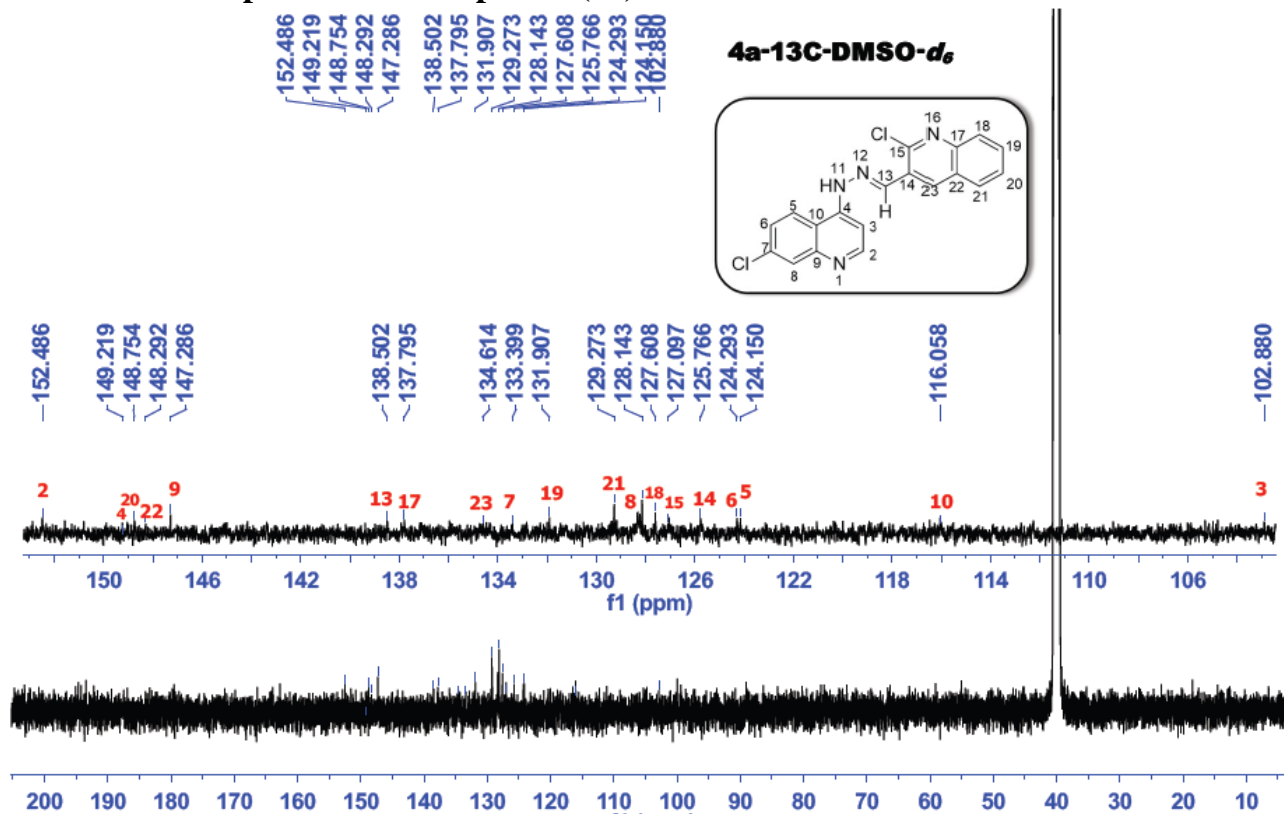

#### S14. IR spectrum of compound (4b)

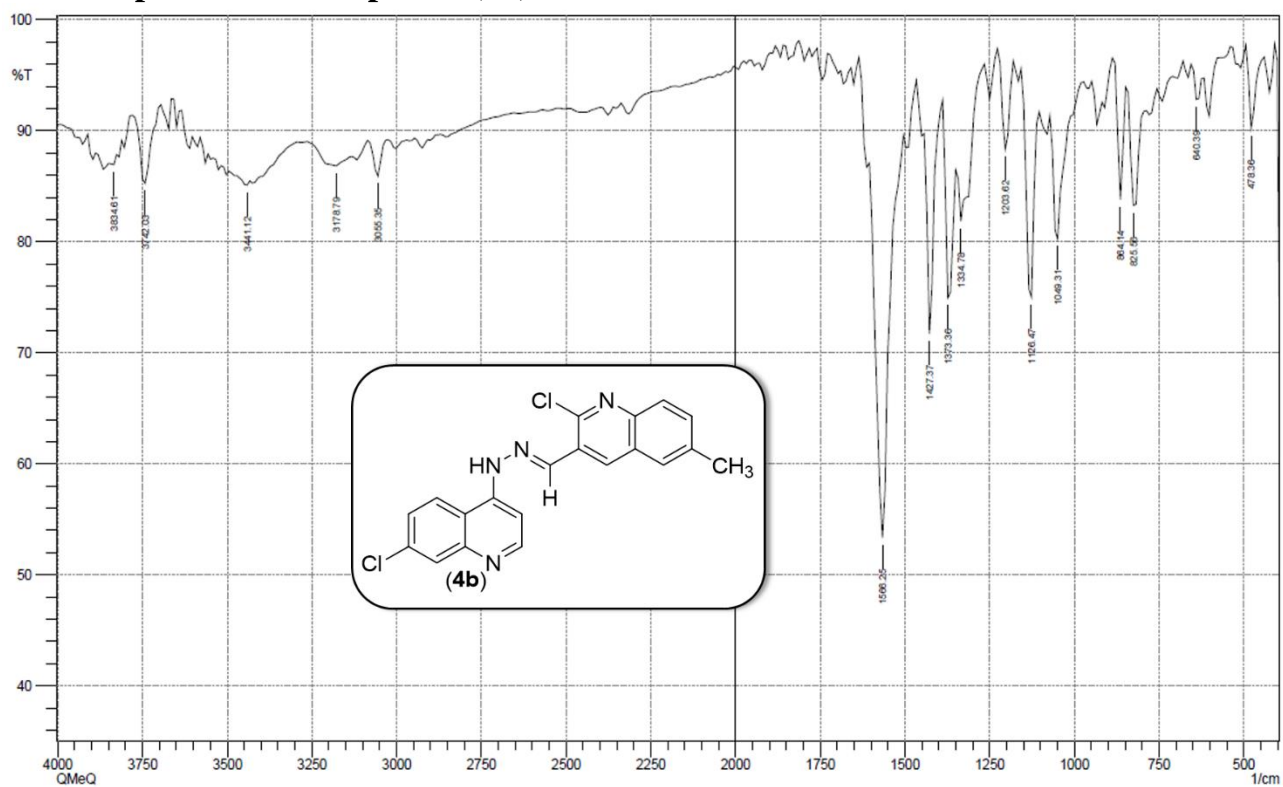

# S15. HR-MS spectrum of compound (4b)

## Display Report

### Analysis Info

Analysis Name D:\Data\Glyphosate\Q-MEQ\_2-F\_2\_01\_468.d  
 Method lc\_ms\_test.m  
 Sample Name Q-MEQ  
 Comment

Acquisition Date 7/31/2016 12:05:10 PM

Operator Anh Mai  
 Instrument micrOTOF-Q 10187

### Acquisition Parameter

|             |          |                       |           |                  |           |
|-------------|----------|-----------------------|-----------|------------------|-----------|
| Source Type | ESI      | Ion Polarity          | Positive  | Set Nebulizer    | 1.2 Bar   |
| Focus       | Active   | Set Capillary         | 4500 V    | Set Dry Heater   | 200 °C    |
| Scan Begin  | 50 m/z   | Set End Plate Offset  | -500 V    | Set Dry Gas      | 9.0 l/min |
| Scan End    | 3000 m/z | Set Collision Cell RF | 350.0 Vpp | Set Divert Valve | Source    |

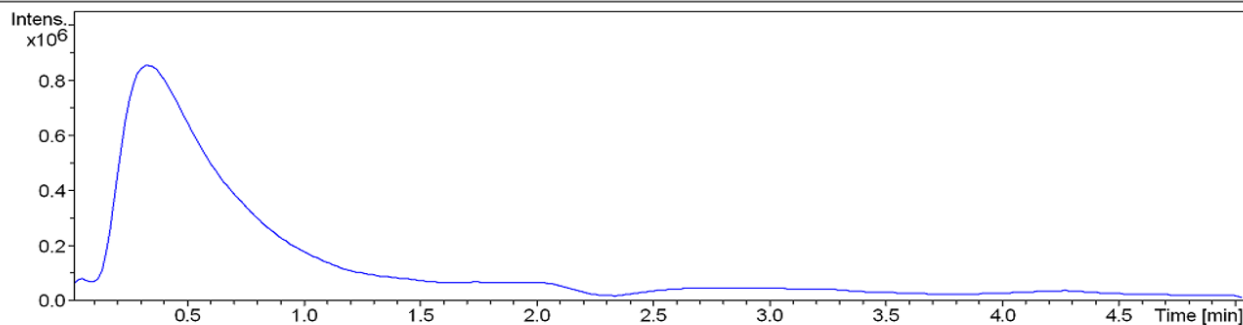

— TIC +All MS, Smoothed (2.01,1,GA)

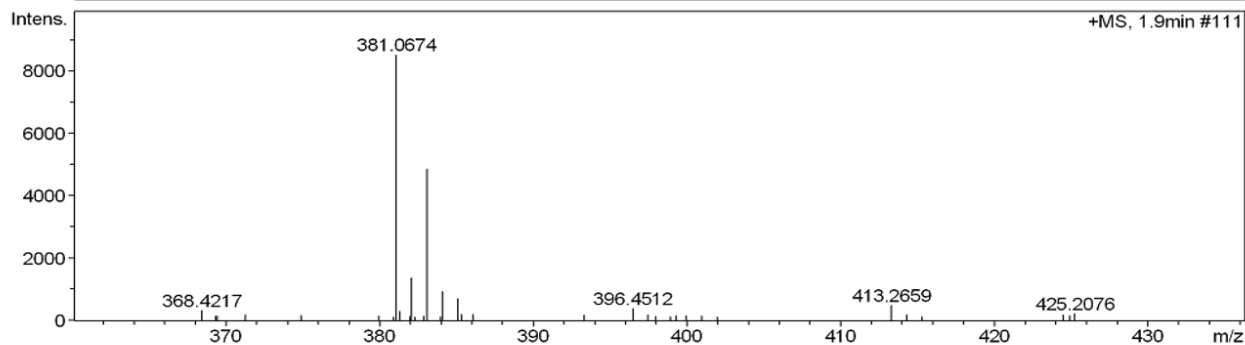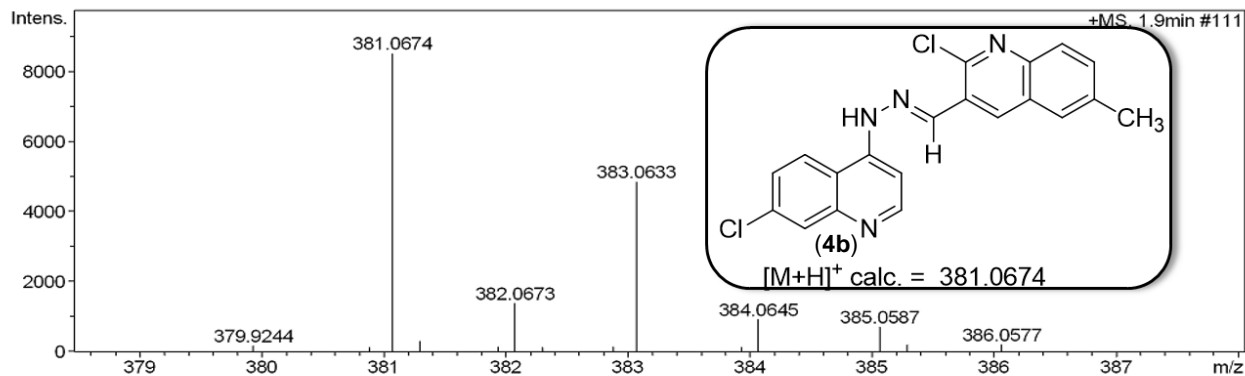

S16.  $^1\text{H}$ -NMR spectrum of compound (4b)

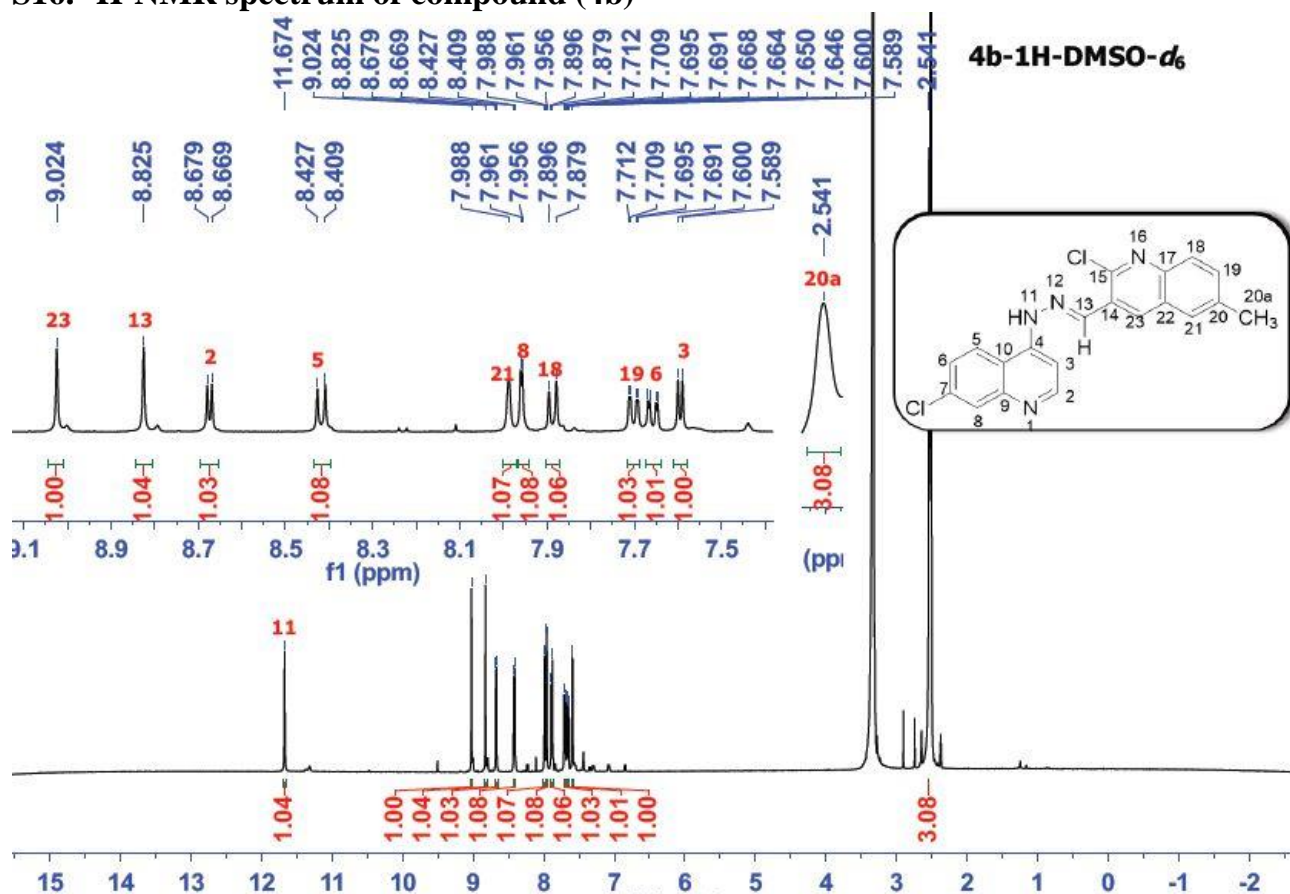

S17.  $^{13}\text{C}$ -NMR spectrum of compound (4b)

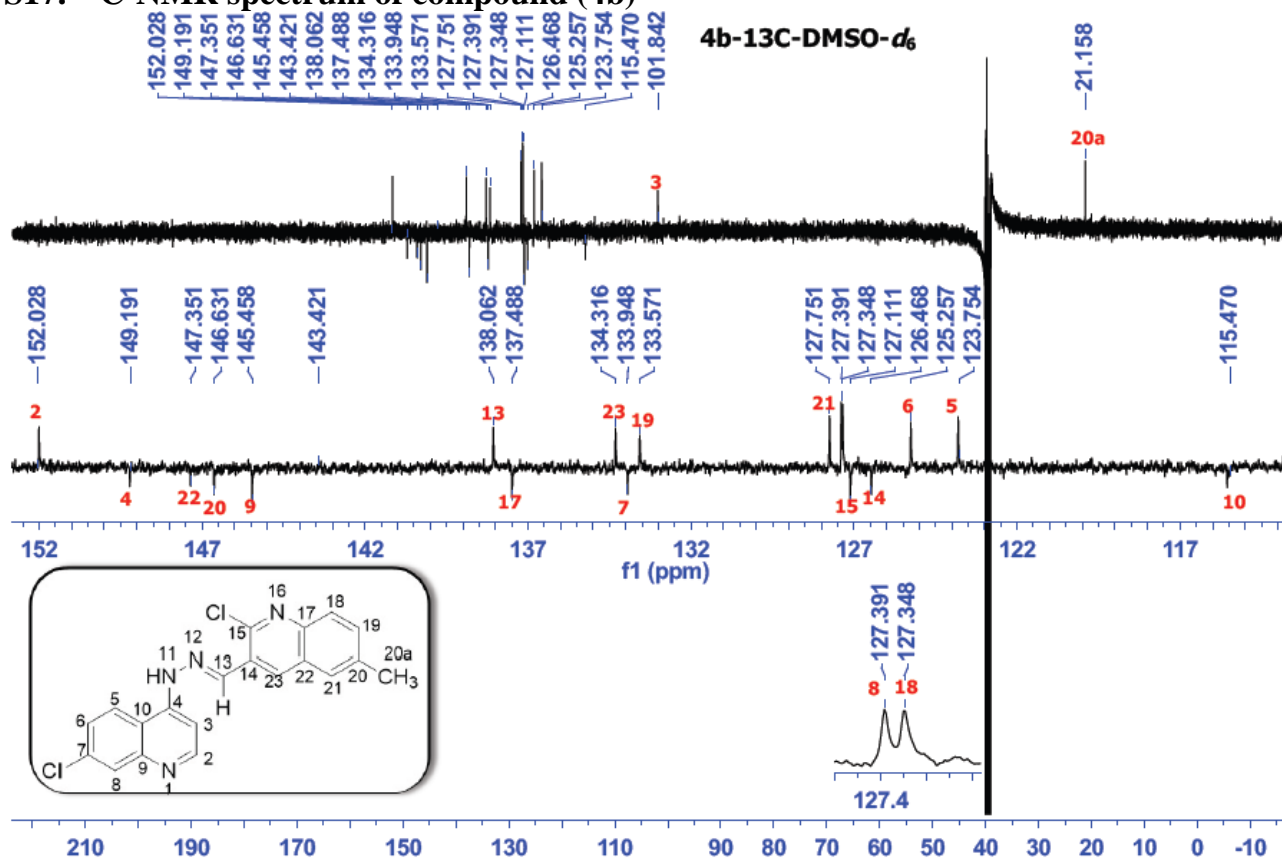

S18. NOESY spectrum of compound (4b) (expanded)

4b-NOESY-DMSO- $d_6$

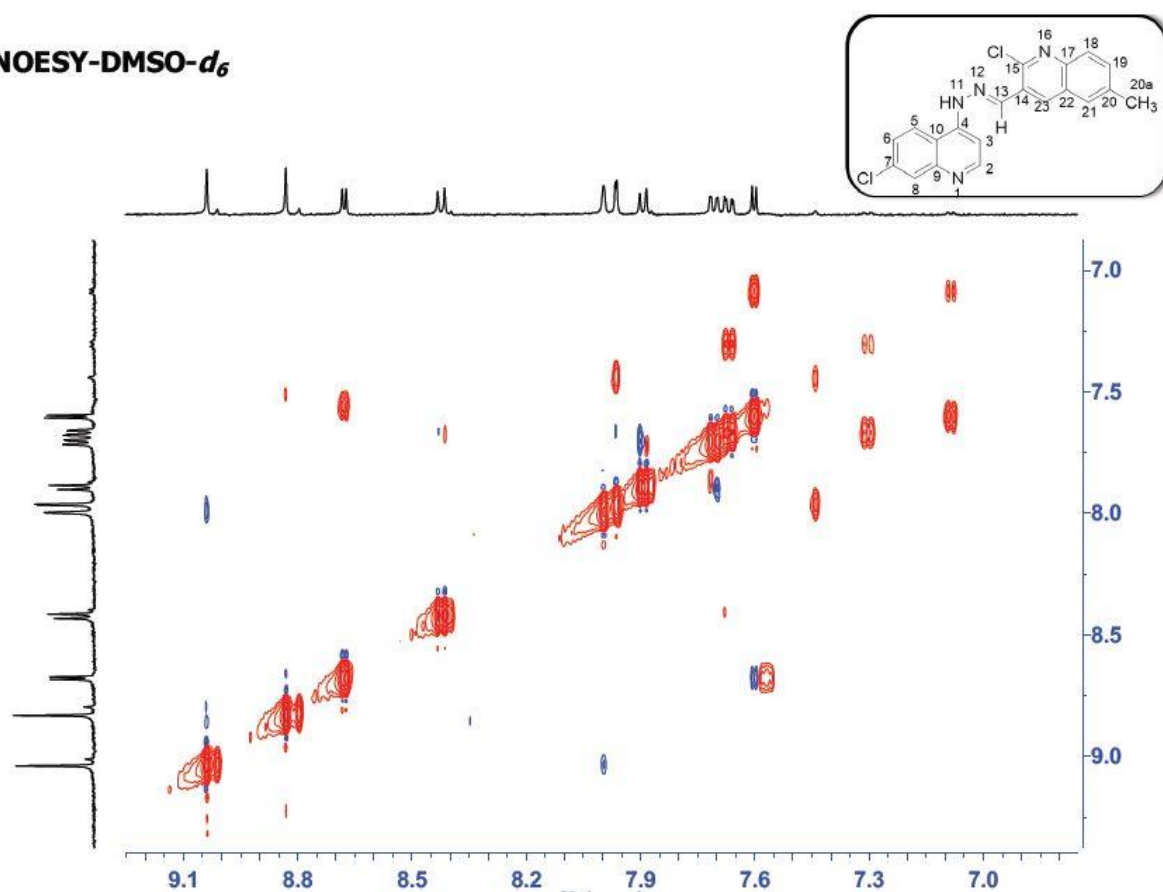



# S19. HSQC spectrum of compound (4b) (expanded)

4b-HSQC-DMSO-*d*<sub>6</sub>

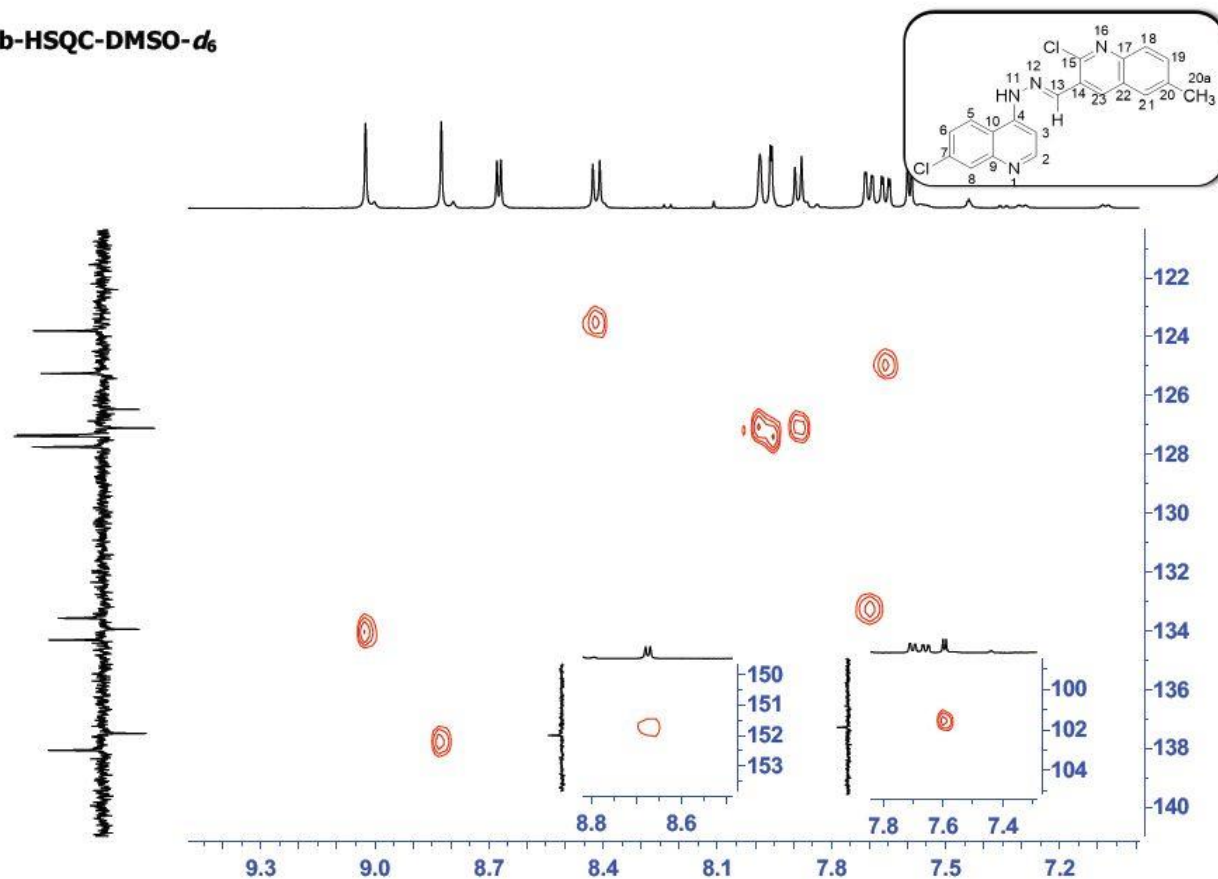

# S20. HMBC spectrum of compound (4b) (Expanded)

4b-HMBC-DMSO-*d*<sub>6</sub>

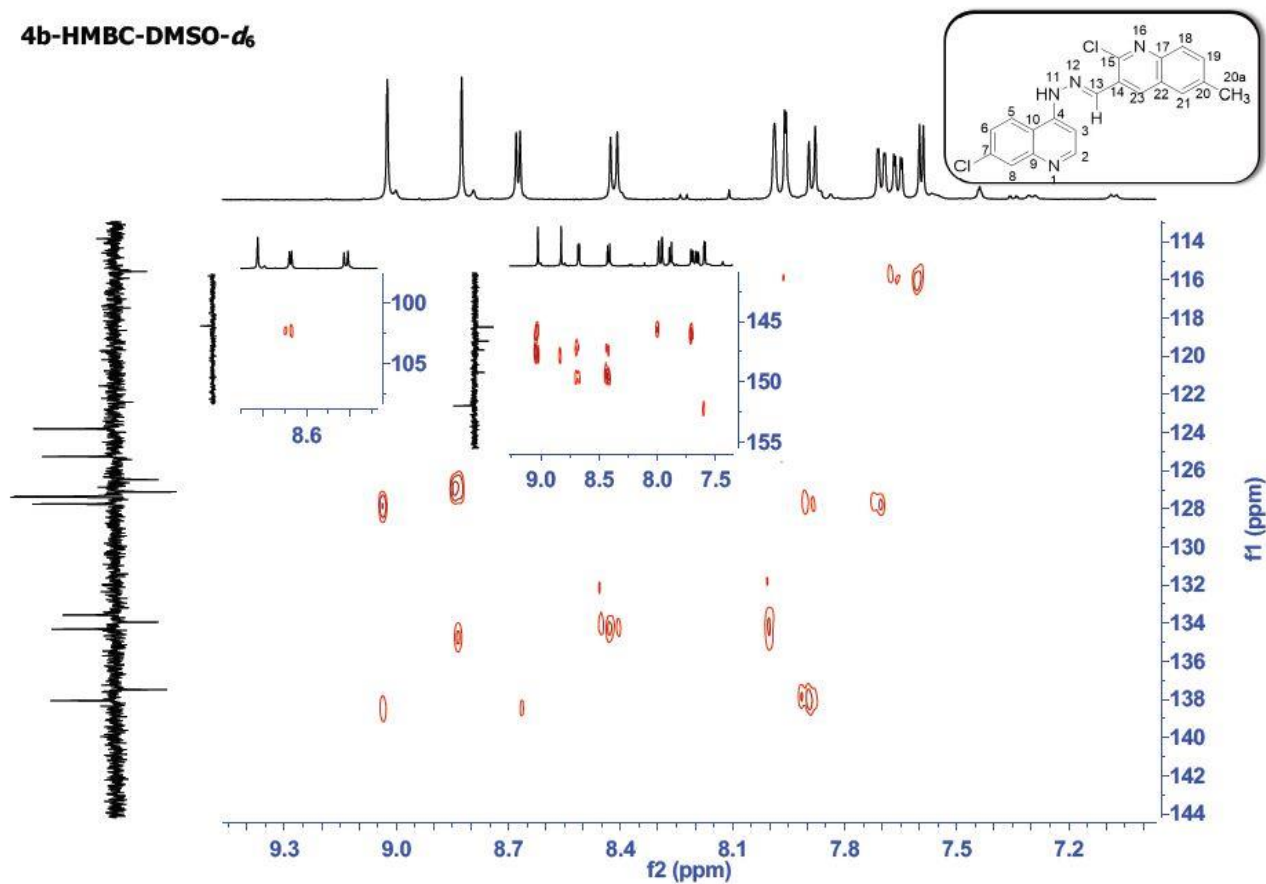

## S21. IR spectrum of compound (4c)

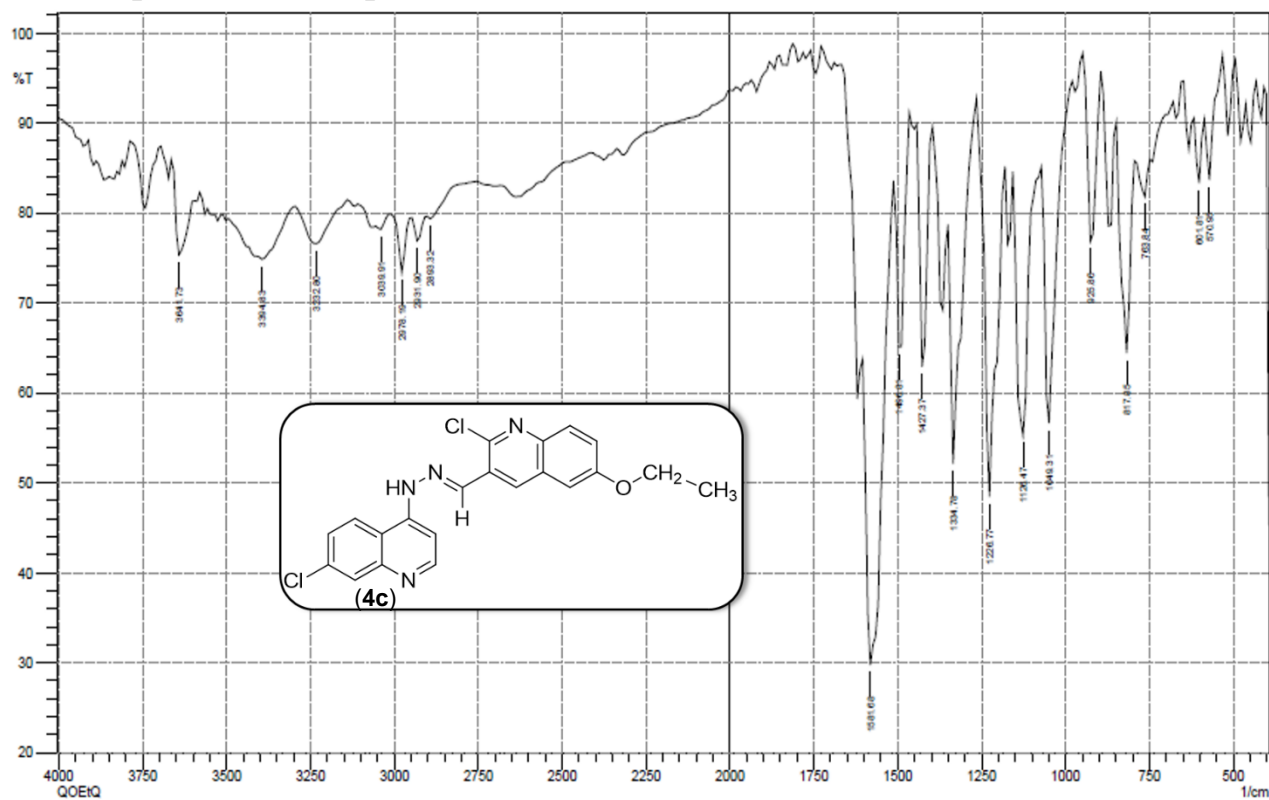



## S22. HR-MS spectrum of compound (4c)

### Display Report

#### Analysis Info

Analysis Name D:\Data\2016\Q-OEtQ\_1-d,4\_01\_911.d  
 Method dmm 2016.m  
 Sample Name Q-OEtQ  
 Comment

Acquisition Date 9/29/2016 3:07:11 PM

Operator Anh Mai  
 Instrument micrOTOF-Q 10187

#### Acquisition Parameter

|             |          |                       |           |                  |           |
|-------------|----------|-----------------------|-----------|------------------|-----------|
| Source Type | ESI      | Ion Polarity          | Positive  | Set Nebulizer    | 1.2 Bar   |
| Focus       | Active   | Set Capillary         | 4500 V    | Set Dry Heater   | 200 °C    |
| Scan Begin  | 50 m/z   | Set End Plate Offset  | -500 V    | Set Dry Gas      | 9.0 l/min |
| Scan End    | 3000 m/z | Set Collision Cell RF | 600.0 Vpp | Set Divert Valve | Source    |

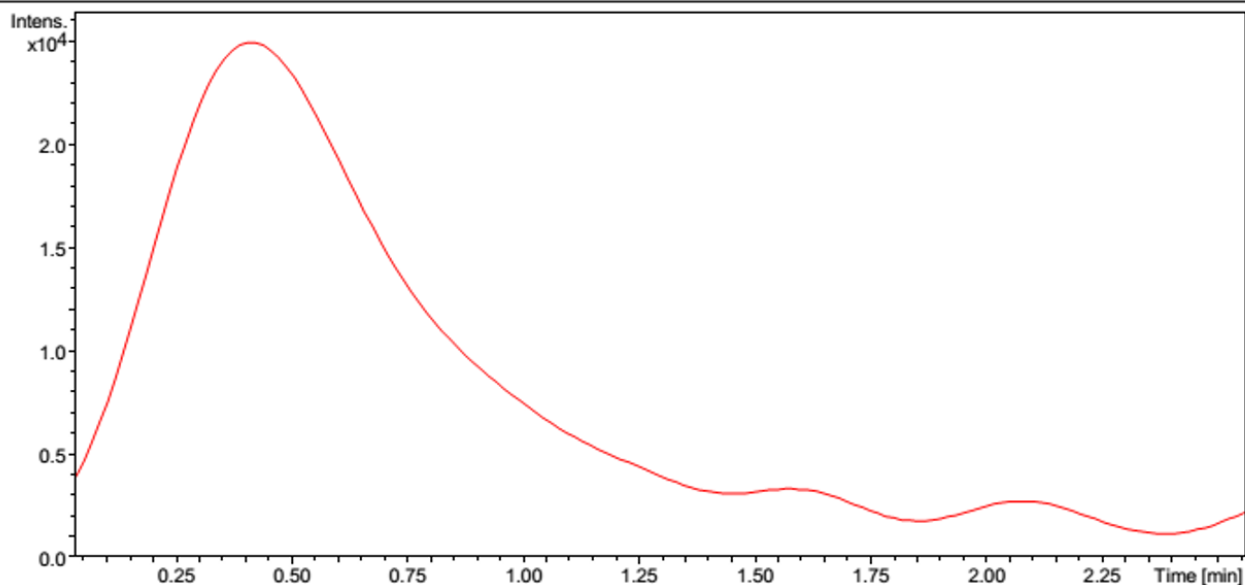

— TIC +All MS, -Spectral Bkgrnd, Smoothed (4.03,1,GA), Smoothed (7.05,1,GA)

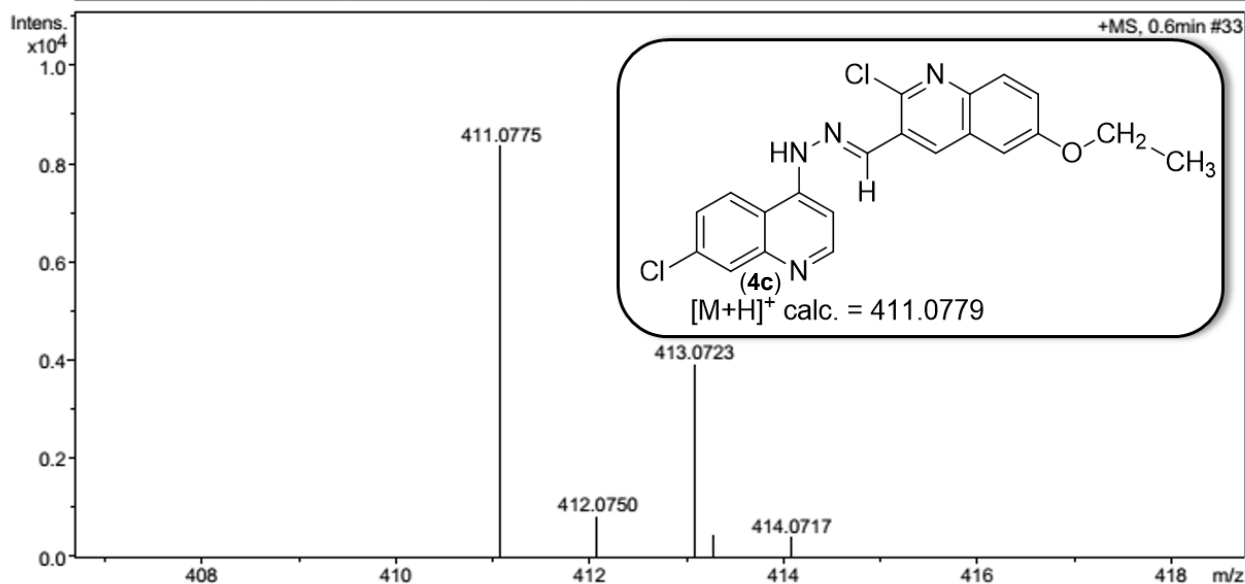

S23.  $^1\text{H}$ -NMR spectrum of compound (4c)

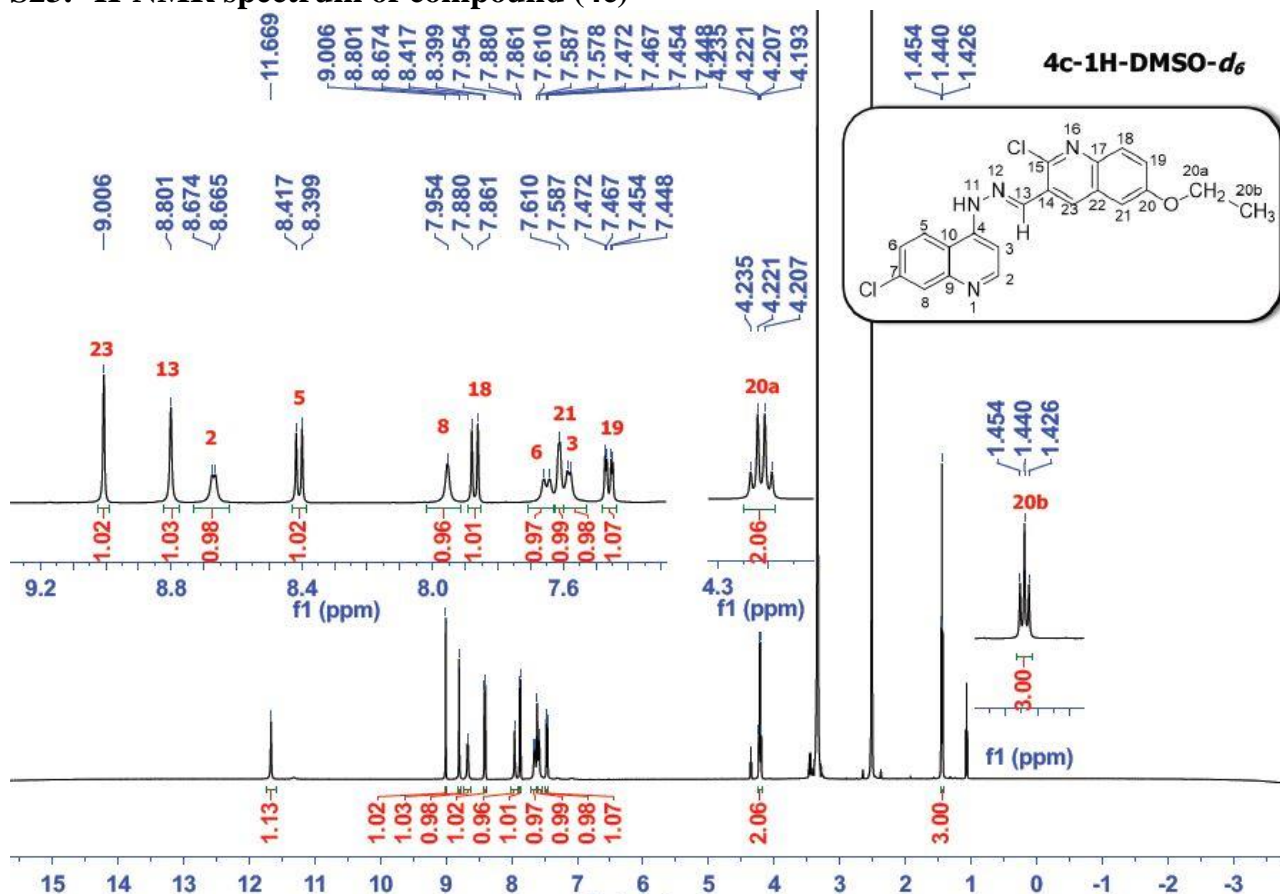

S24.  $^{13}\text{C}$ -NMR spectrum of compound (4c)

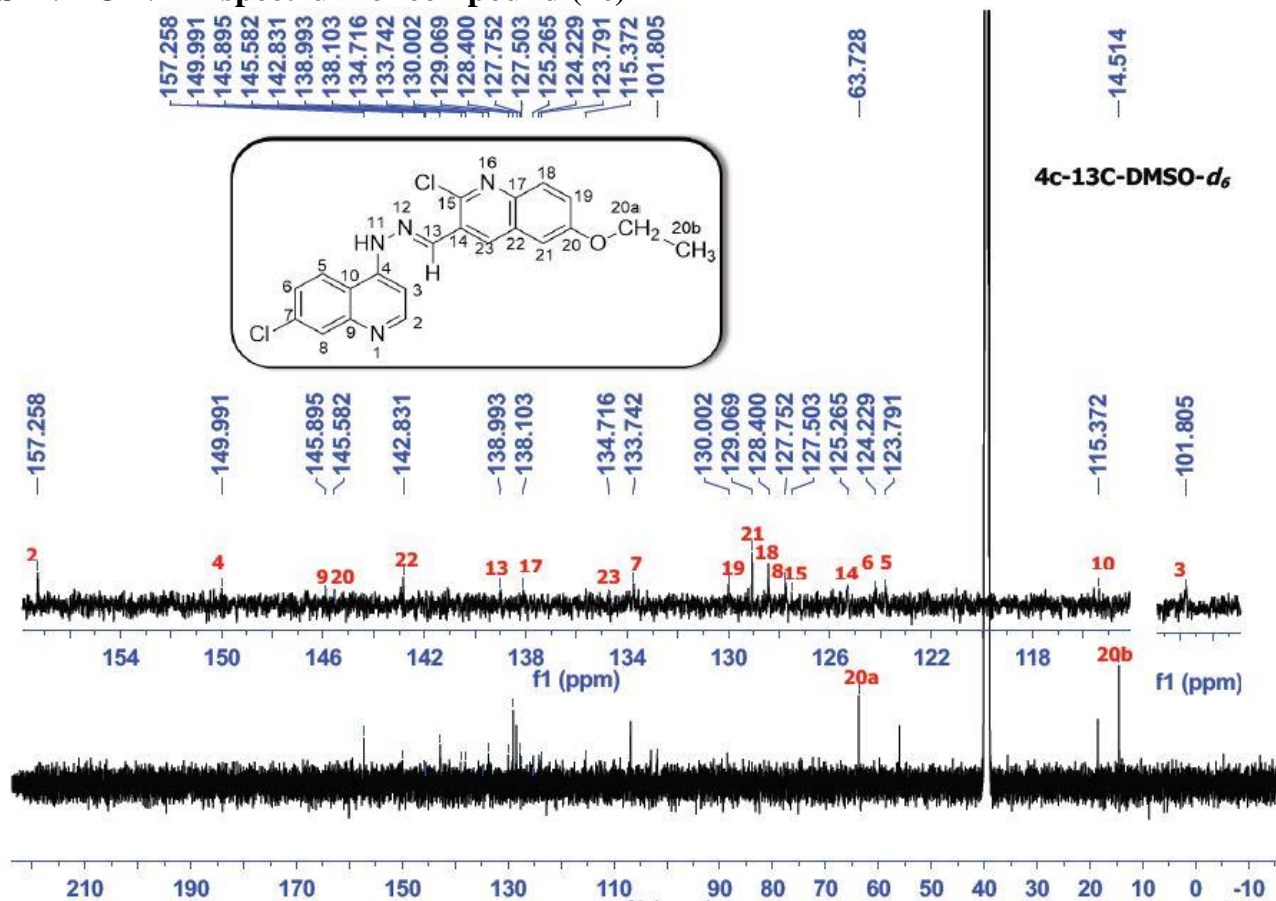

**S25. IR spectrum of compound (4d)**

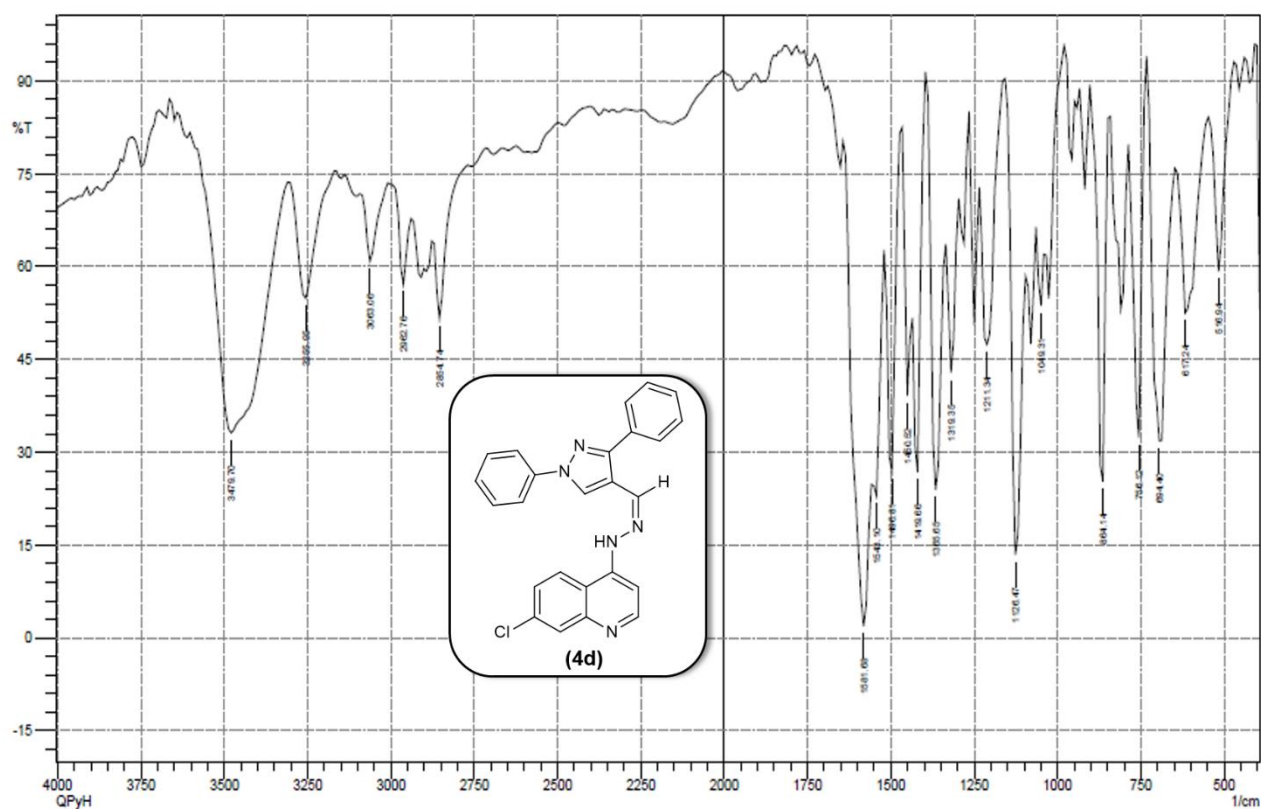

# S26. HR-MS spectrum of compound (4d)

## Display Report

### Analysis Info

Analysis Name D:\Data\2016\Q-pyH\_1-d,8\_01\_915.d  
 Method dmm 2016.m  
 Sample Name Q-pyH  
 Comment

Acquisition Date 9/29/2016 3:30:16 PM

Operator Anh Mai  
 Instrument micrOTOF-Q 10187

### Acquisition Parameter

|             |          |                       |           |                  |           |
|-------------|----------|-----------------------|-----------|------------------|-----------|
| Source Type | ESI      | Ion Polarity          | Positive  | Set Nebulizer    | 1.2 Bar   |
| Focus       | Active   | Set Capillary         | 4500 V    | Set Dry Heater   | 200 °C    |
| Scan Begin  | 50 m/z   | Set End Plate Offset  | -500 V    | Set Dry Gas      | 9.0 l/min |
| Scan End    | 3000 m/z | Set Collision Cell RF | 600.0 Vpp | Set Divert Valve | Source    |

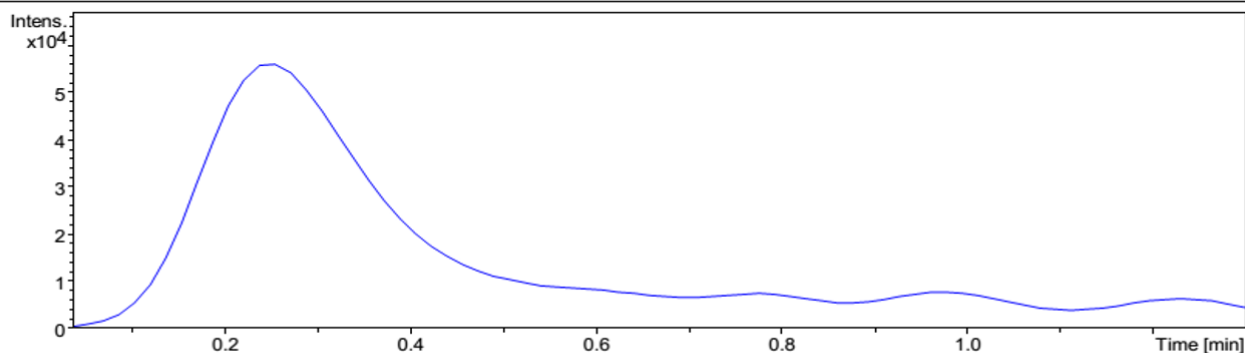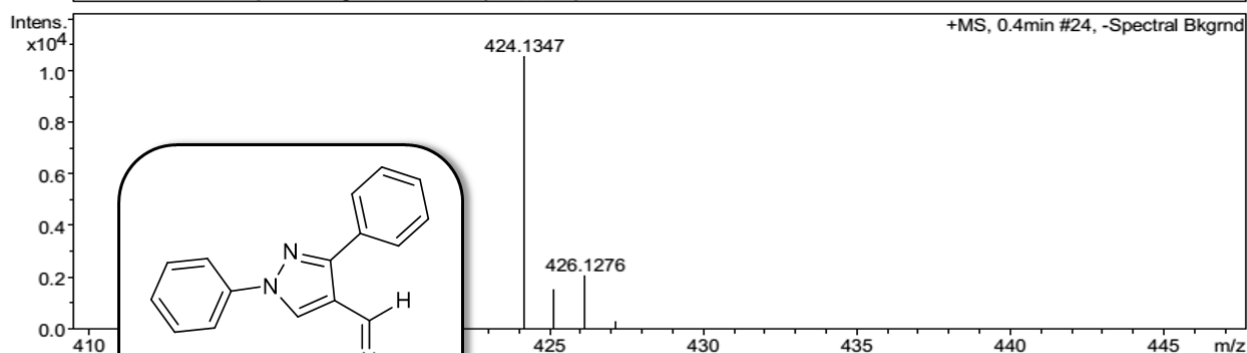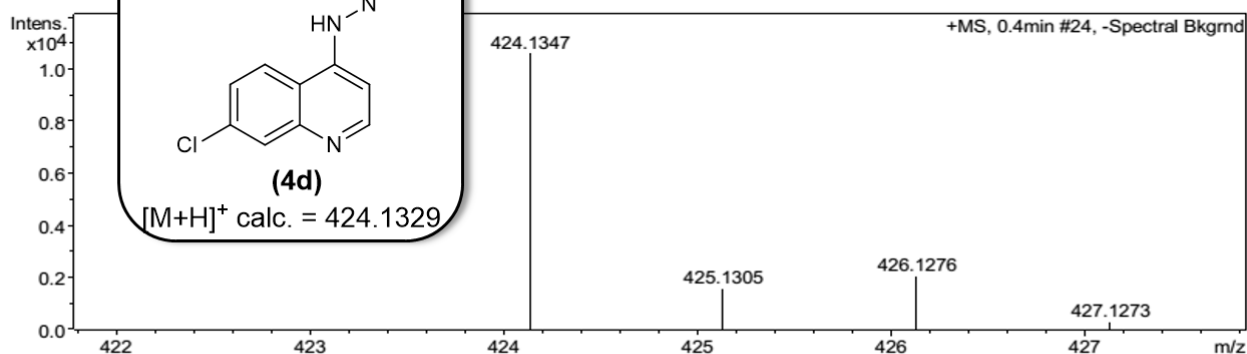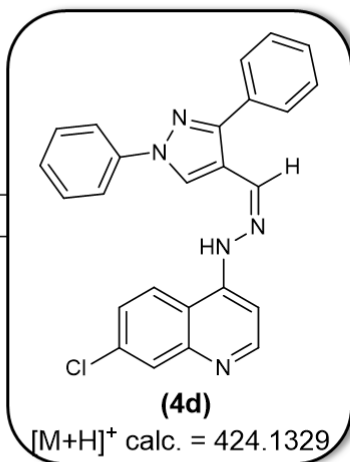

S27.  $^1\text{H}$ -NMR spectrum of compound (4d)

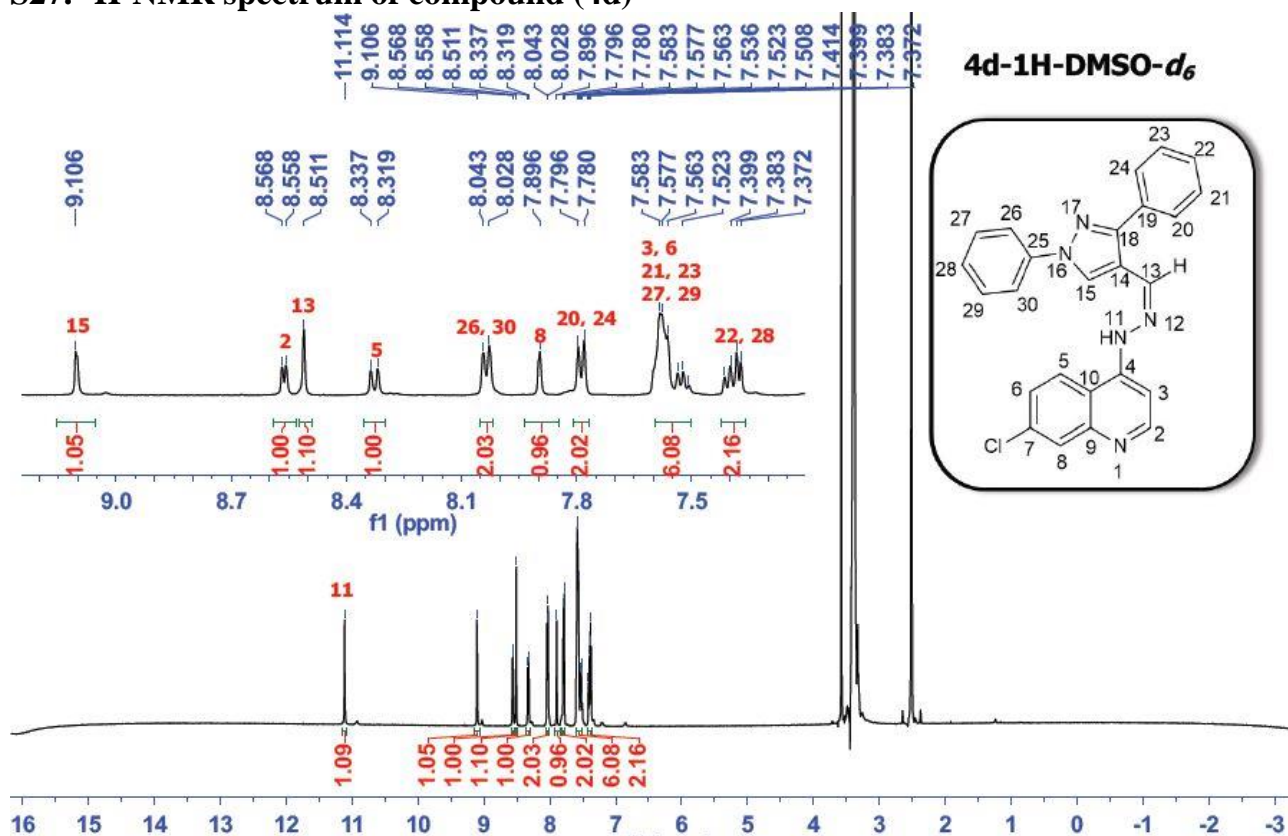

S28.  $^{13}\text{C}$ -NMR spectrum of compound (4d)

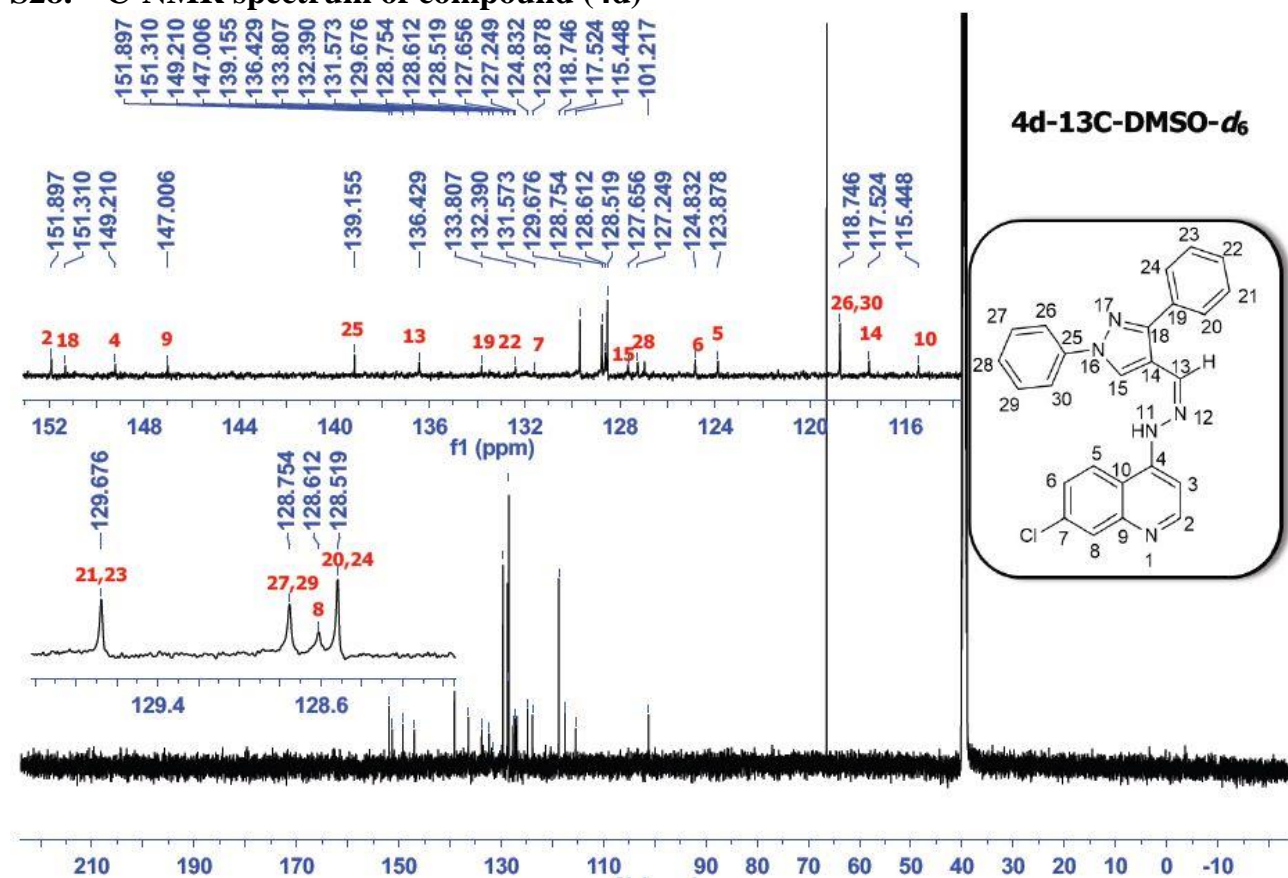



S29. NOESY spectrum of compound (4d) (expanded)

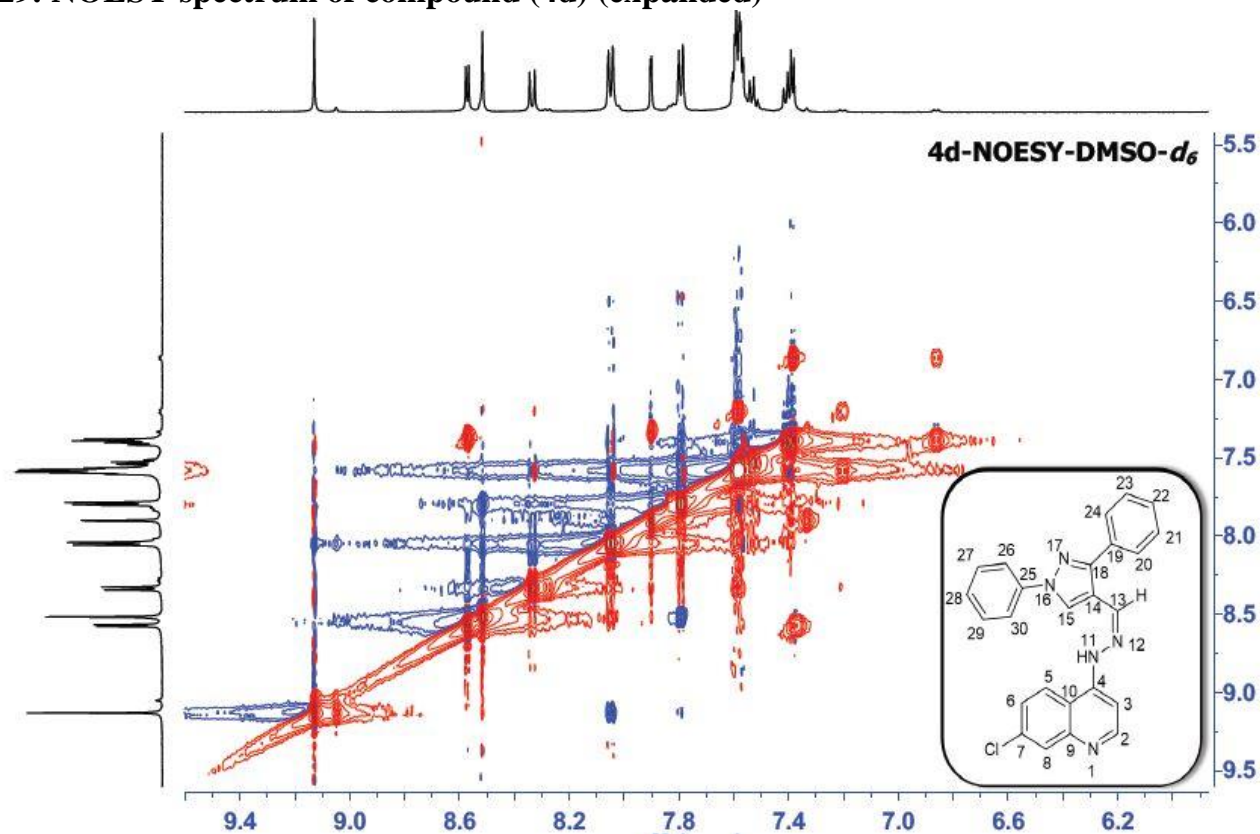

S30. IR spectrum of compound (4e)

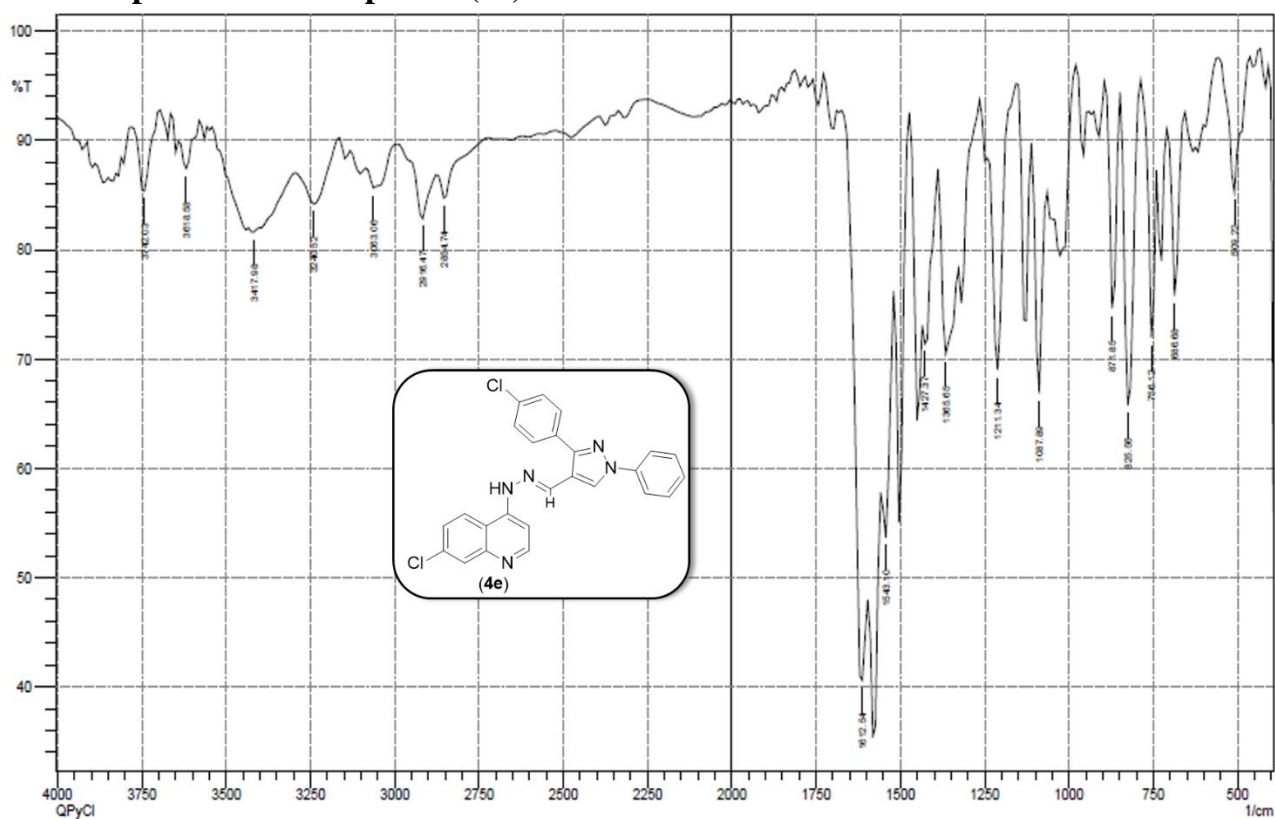

# S31. HR-MS spectrum of compound (4e)

## Display Report

### Analysis Info

Analysis Name D:\Data\2016\Q-pyCl\_1-d,6\_01\_913.d  
 Method dmm 2016.m  
 Sample Name Q-pyCl  
 Comment

Acquisition Date 9/29/2016 3:18:43 PM

Operator Anh Mai  
 Instrument micrOTOF-Q 10187

### Acquisition Parameter

|             |          |                       |           |                  |           |
|-------------|----------|-----------------------|-----------|------------------|-----------|
| Source Type | ESI      | Ion Polarity          | Positive  | Set Nebulizer    | 1.2 Bar   |
| Focus       | Active   | Set Capillary         | 4500 V    | Set Dry Heater   | 200 °C    |
| Scan Begin  | 50 m/z   | Set End Plate Offset  | -500 V    | Set Dry Gas      | 9.0 l/min |
| Scan End    | 3000 m/z | Set Collision Cell RF | 600.0 Vpp | Set Divert Valve | Source    |

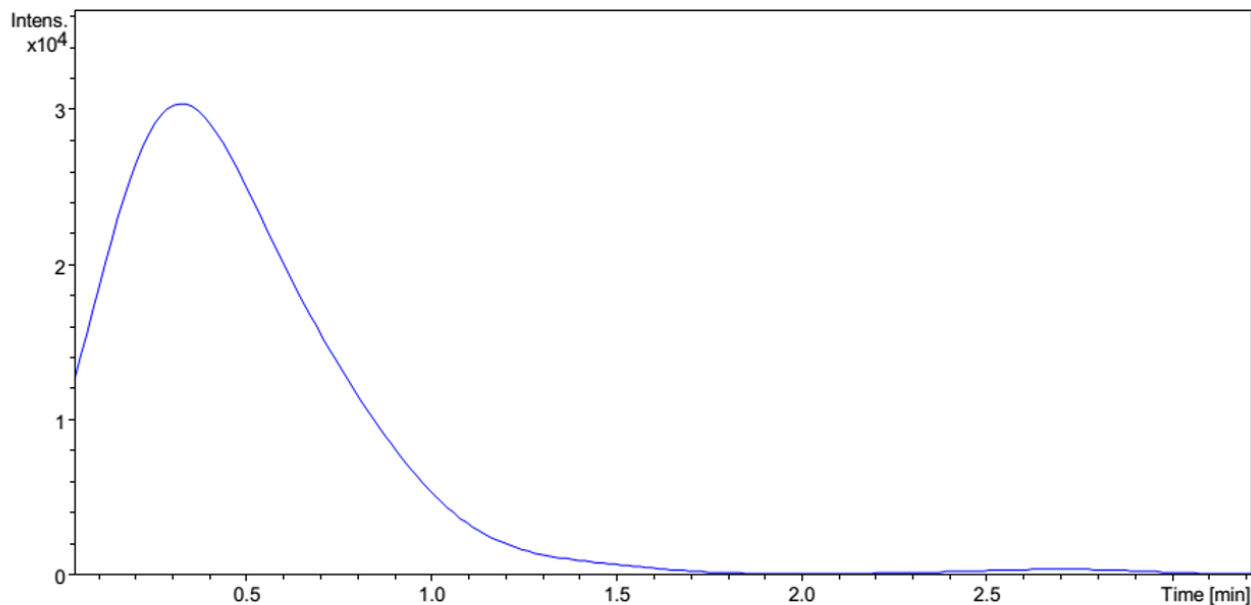

— TIC +All MS, -Spectral Bkgrnd, Smoothed (8.05,2,GA)

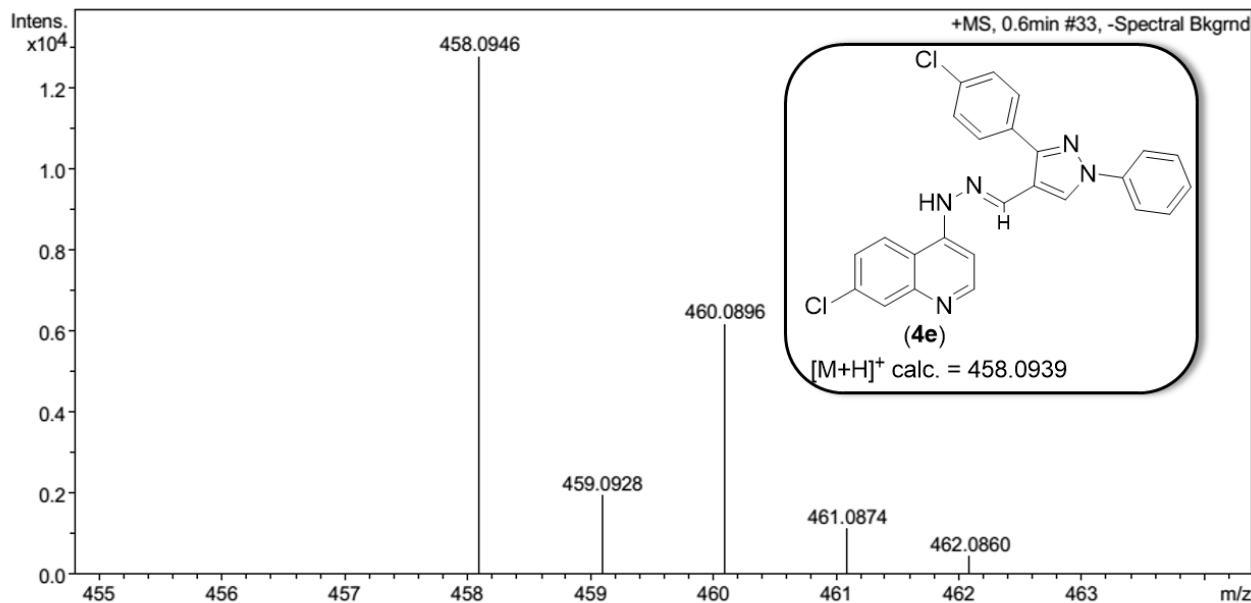

S32.  $^1\text{H}$ -NMR spectrum of compound (4e)

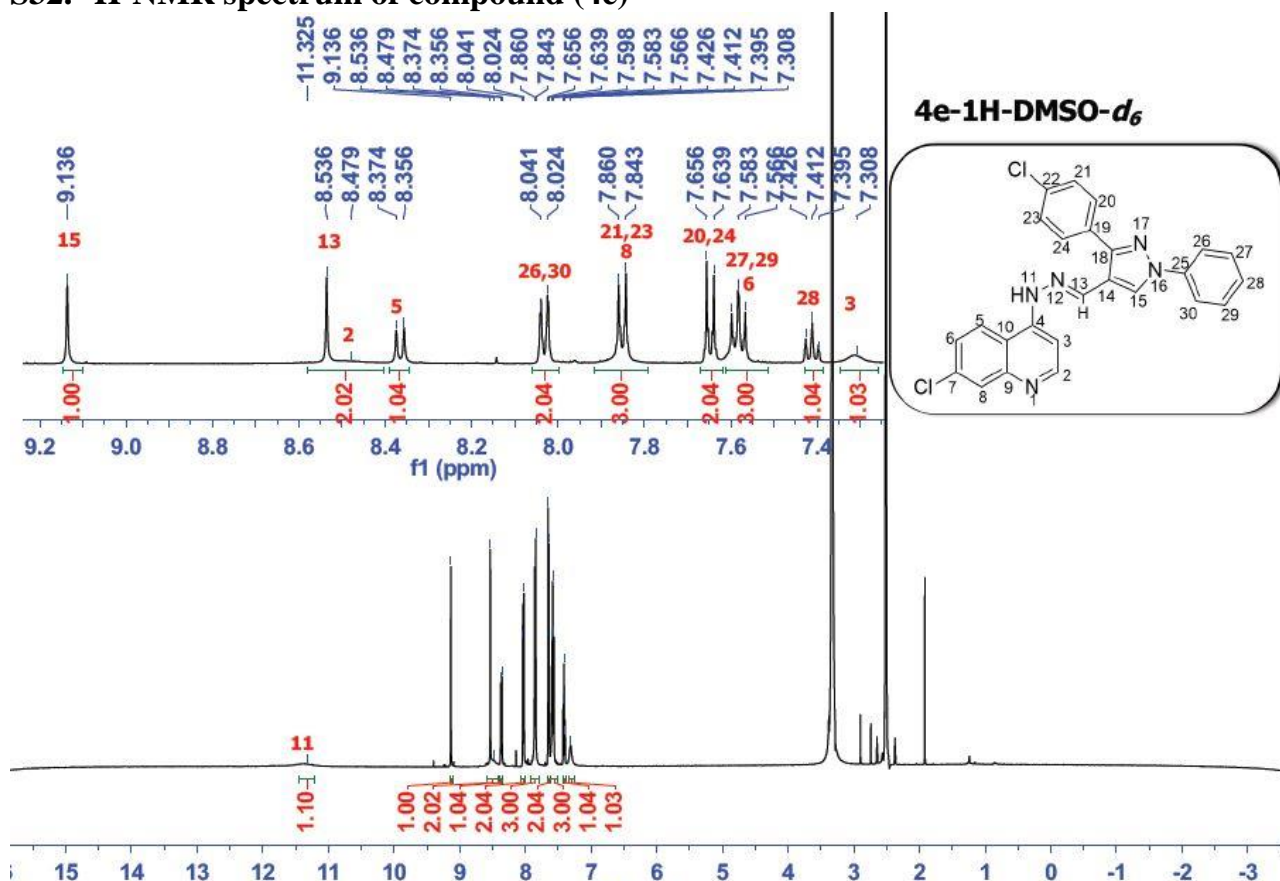

S33.  $^{13}\text{C}$ -NMR spectrum of compound (4e)

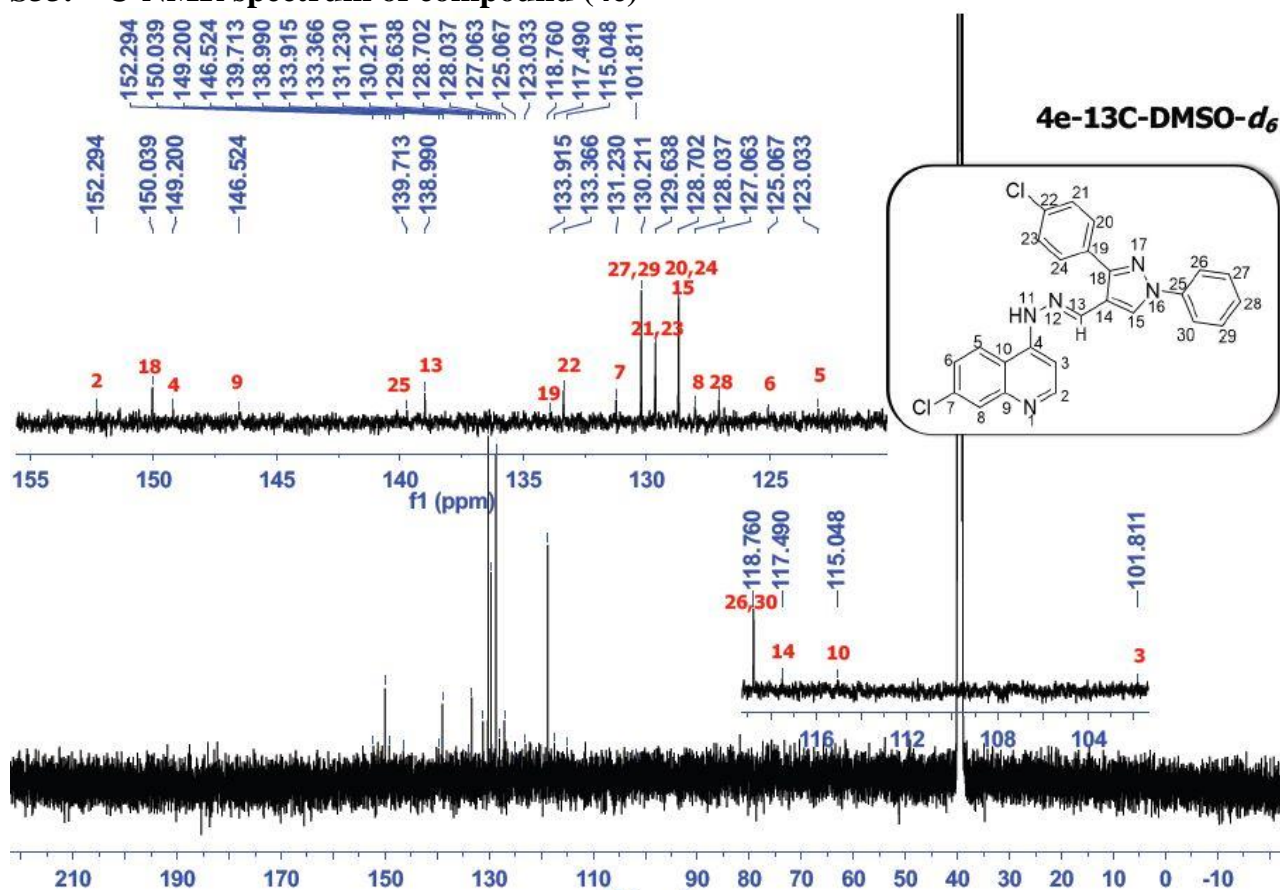



**S34. NOESY spectrum of compound (4e) (expanded)**

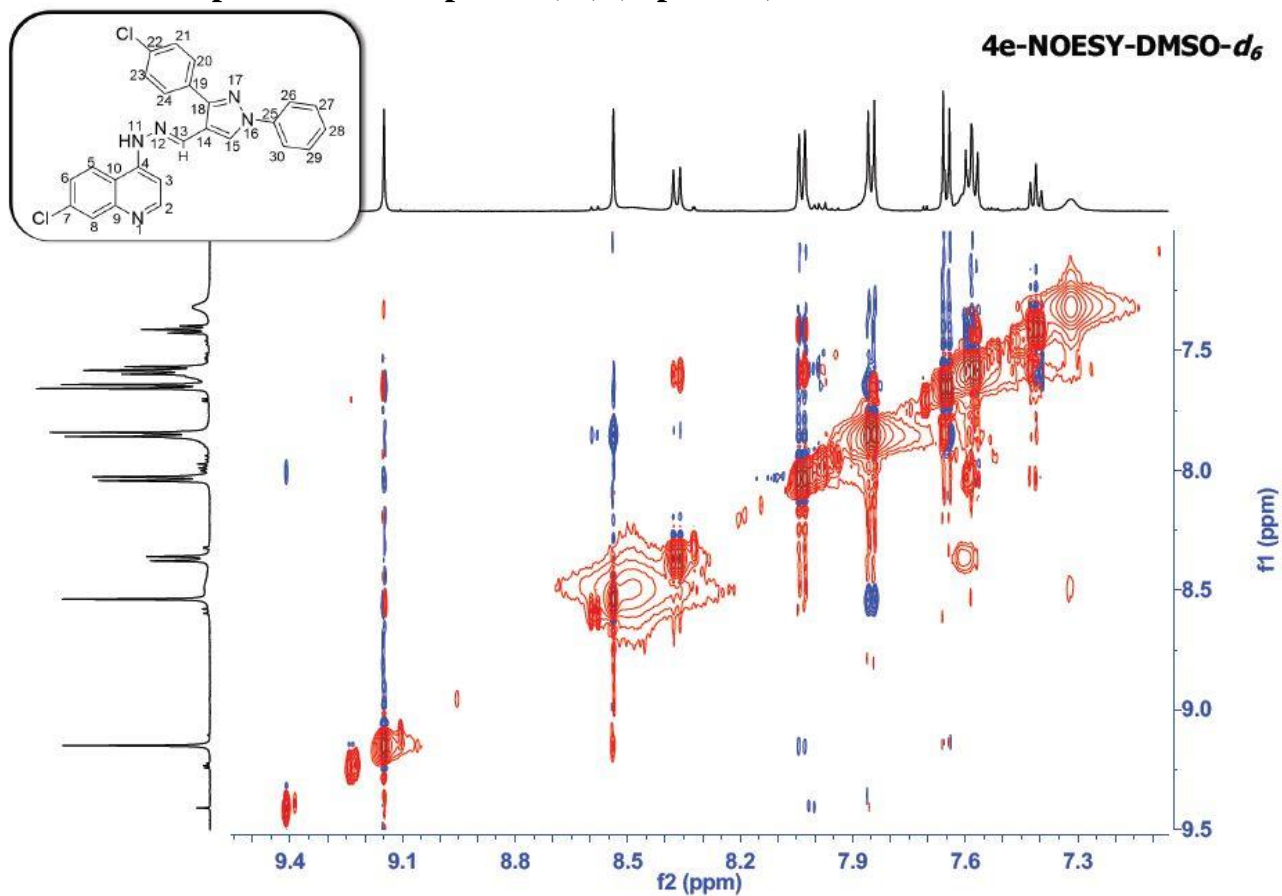

**S35. HSQC spectrum of compound (4e) (expanded)**

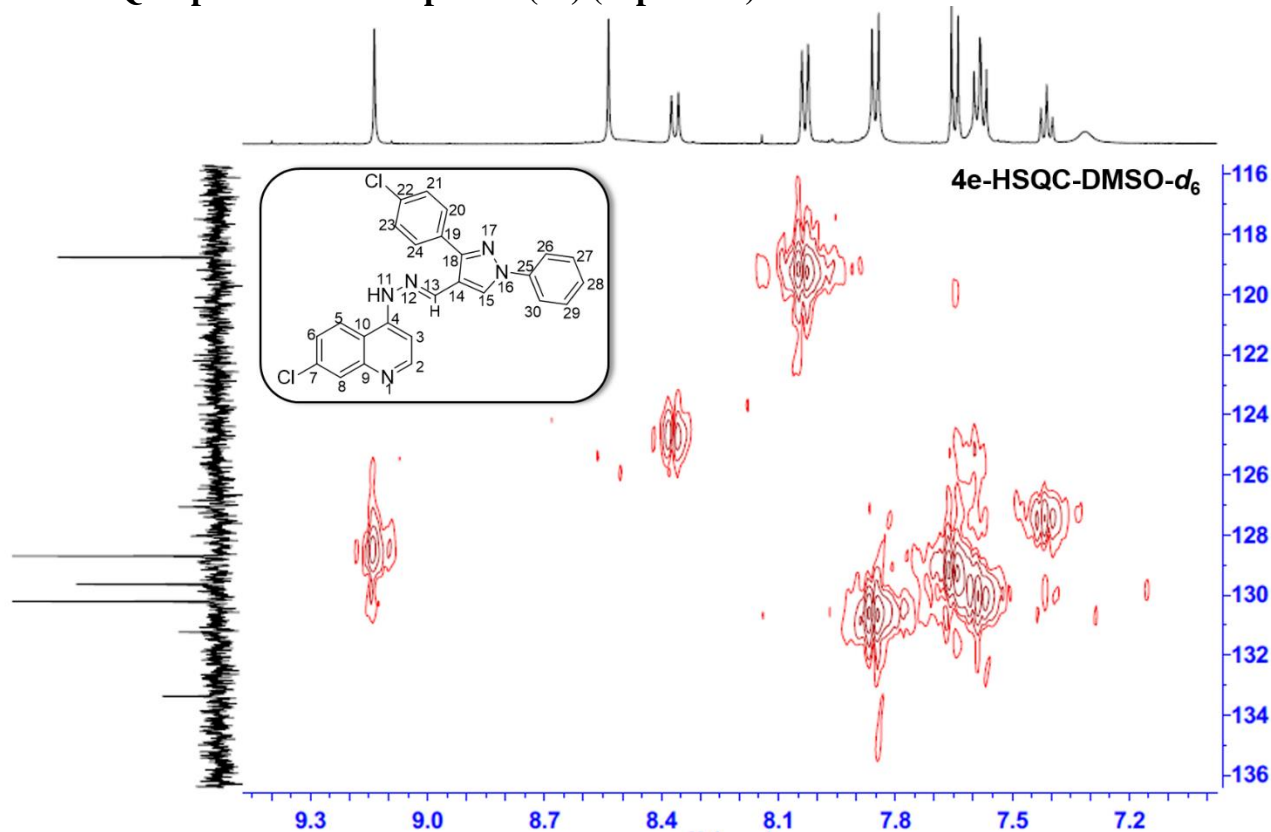

**S36. HMBC spectrum of compound (4e) (expanded)**

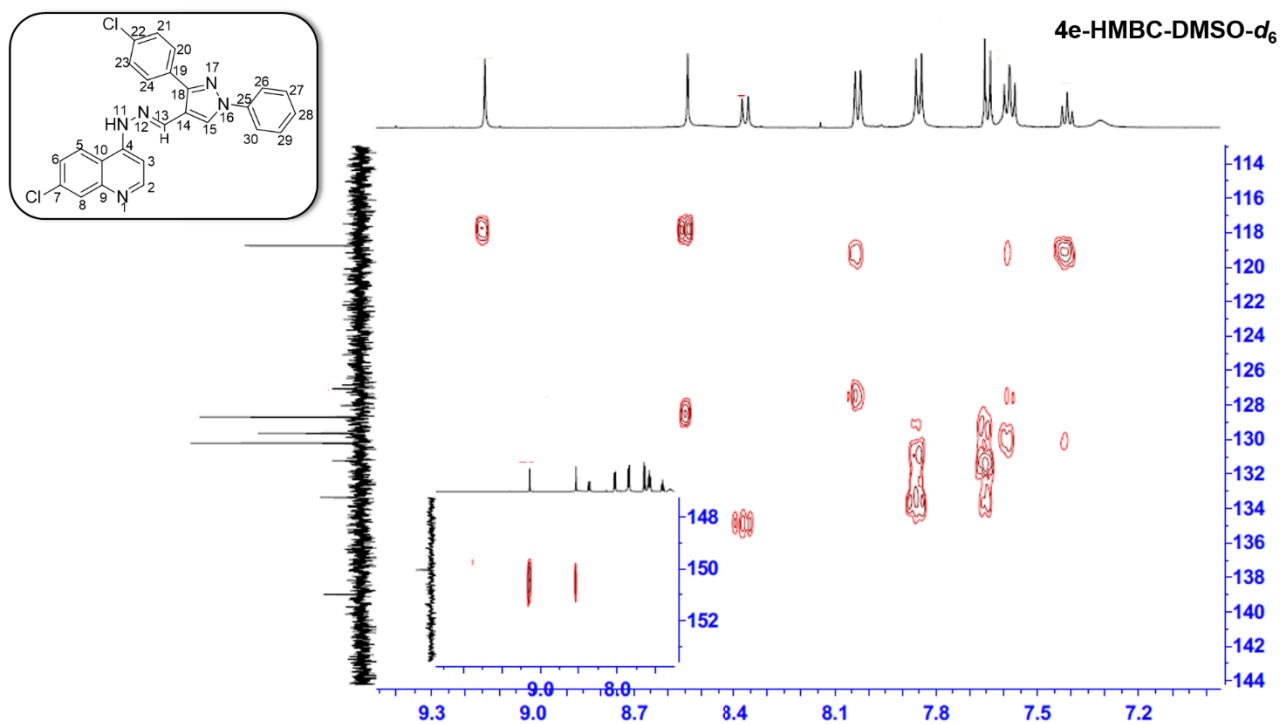

**S37. IR spectrum of compound (4f)**

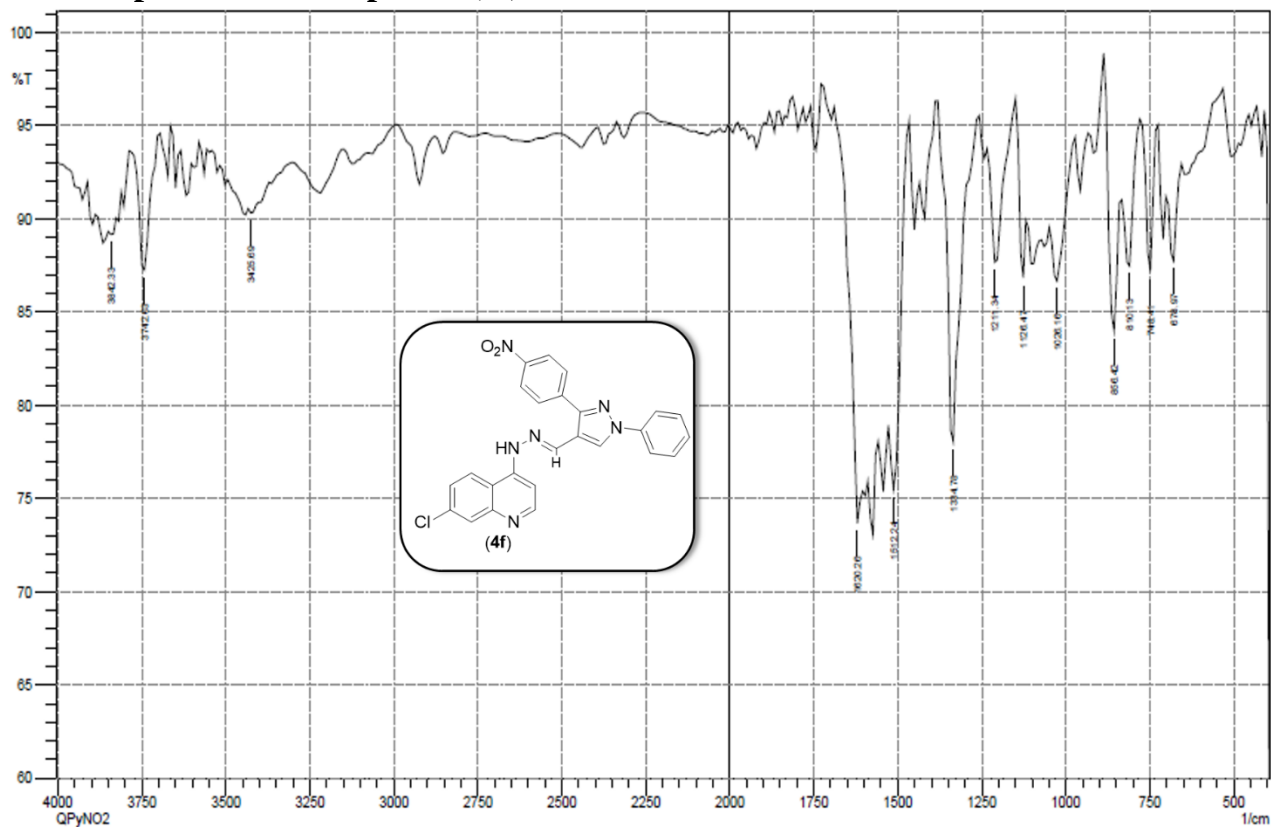

# S38. HR-MS spectrum of compound (4f)

## Display Report

### Analysis Info

Analysis Name D:\Data\2016\Q-pyNO2\_1-d,5\_01\_912.d  
 Method dmm 2016.m  
 Sample Name Q-pyNO2  
 Comment

Acquisition Date 9/29/2016 3:12:58 PM

Operator Anh Mai  
 Instrument micrOTOF-Q 10187

### Acquisition Parameter

|             |          |                       |           |                  |           |
|-------------|----------|-----------------------|-----------|------------------|-----------|
| Source Type | ESI      | Ion Polarity          | Positive  | Set Nebulizer    | 1.2 Bar   |
| Focus       | Active   | Set Capillary         | 4500 V    | Set Dry Heater   | 200 °C    |
| Scan Begin  | 50 m/z   | Set End Plate Offset  | -500 V    | Set Dry Gas      | 9.0 l/min |
| Scan End    | 3000 m/z | Set Collision Cell RF | 600.0 Vpp | Set Divert Valve | Source    |

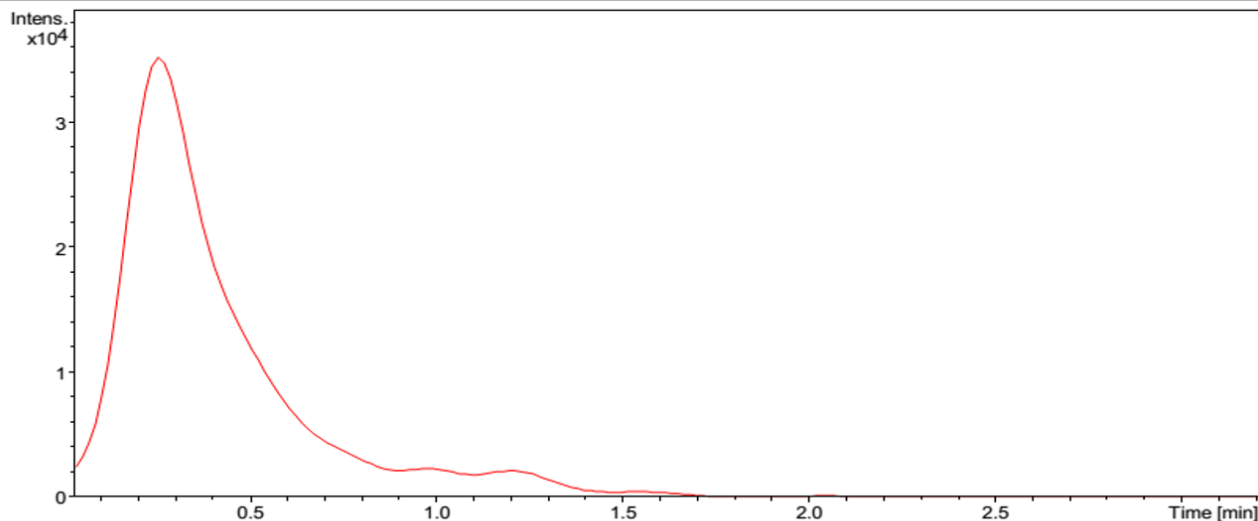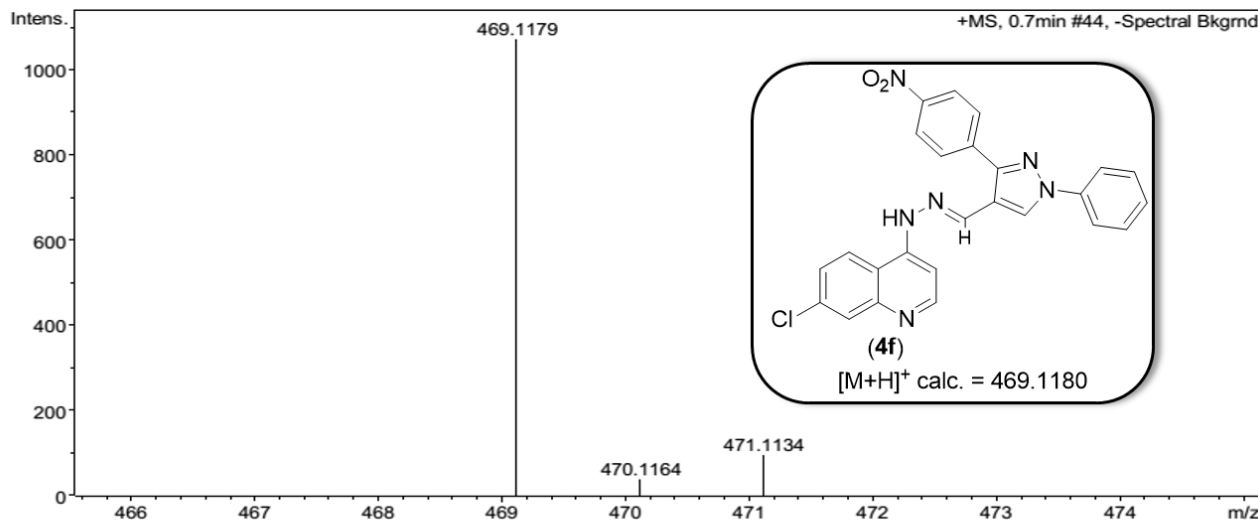

S39.  $^1\text{H}$ -NMR spectrum of compound (4f)

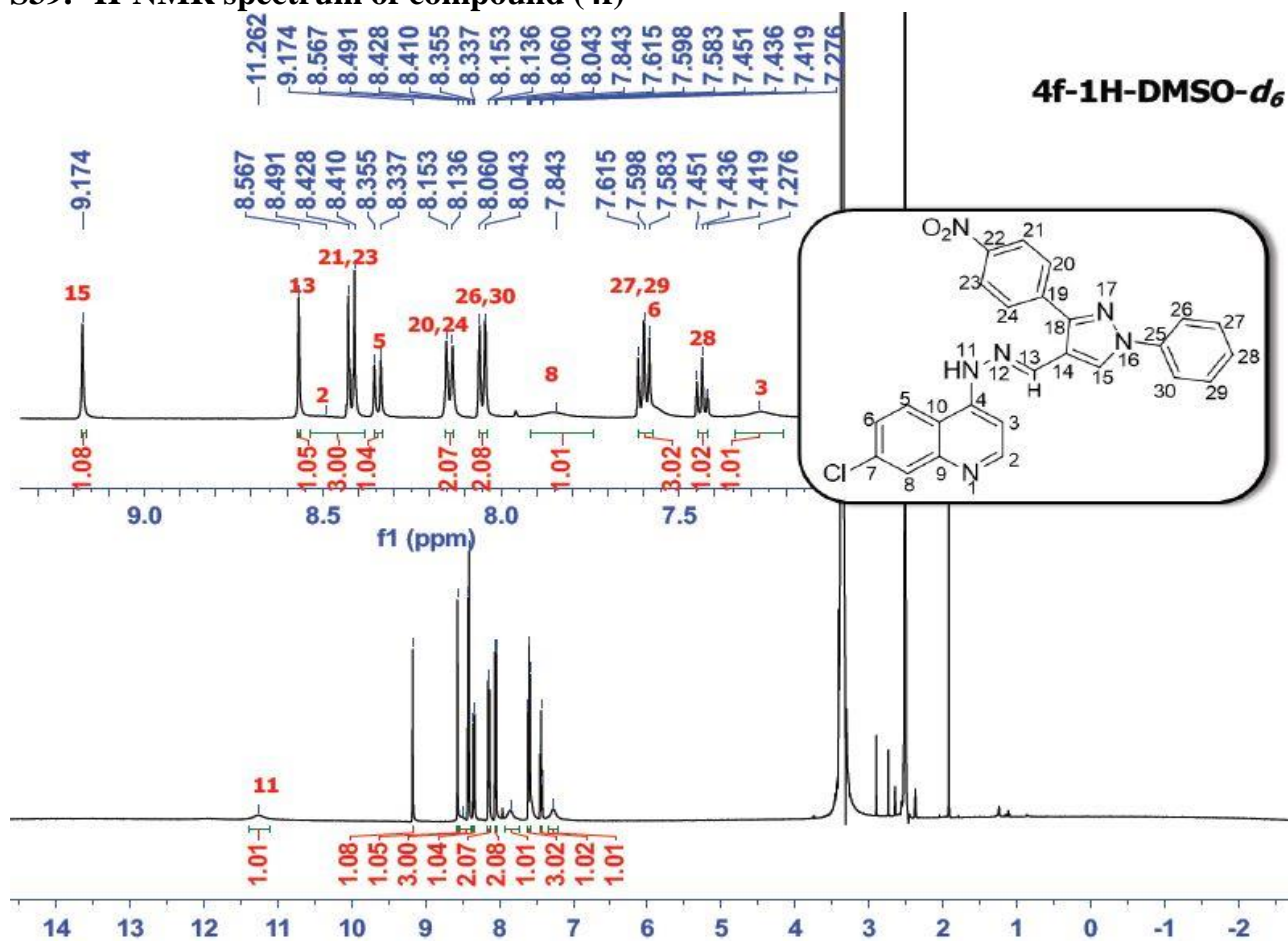

S40.  $^{13}\text{C}$ -NMR spectrum of compound (4f)

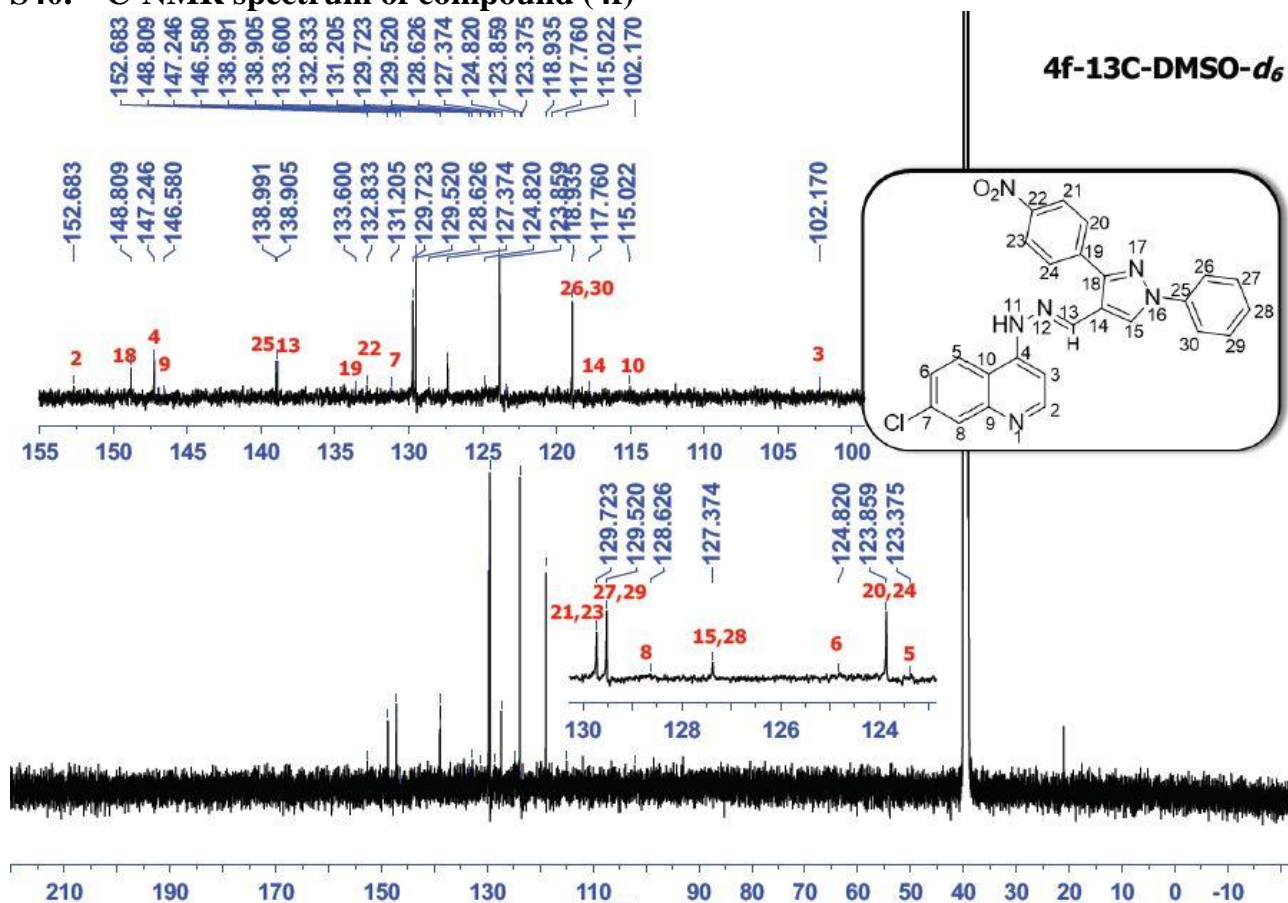

Supplement: f1 [file 4301847.f1.pdf]
